# Supplementary material for: Computation of rate coefficients in solutions based on transition state theory combined with a heuristically corrected polarizable continuum model: intermolecular Diels–Alder reactions as case studies
Source: Royal Society of Chemistry journal article supplement (doi:10.1039/d4cp01078g), 2024-01-01
Supplement: d4cp01078g1.pdf [file d4cp01078g1.pdf]

Supplemental information for:

## **Computation of Rate Coefficients in Solutions Based on Transition State Theory Combined with a Heuristically Corrected Polarizable Continuum Model: Intermolecular Diels-Alder Reactions as Case Studies**

Yu-ichiro Izato,<sup>\*a</sup> Mitsuo Koshi,<sup>b</sup> and Atsumi Miyake<sup>a</sup>

<sup>a</sup> Graduate School of Information and Environment Sciences, Yokohama National University

79-7 Tokiwadai, Hodogaya-ku, Yokohama, Kanagawa 240-8501, Japan

Phone: +81-45-339-3992

<sup>b</sup> Professor Emeritus, The University of Tokyo

7-3-1 Hongo, Bunkyo-ku, Tokyo 113-8654, Japan.

\*Corresponding address : [izato-yuichiro-tk@ynu.ac.jp](mailto:izato-yuichiro-tk@ynu.ac.jp)

Contents:

Table S1. Cartesian coordination for all molecules investigated in this study.

Table S2. Rate coefficients for 12 reactions in various solvents based on the proposed method and the IGT technique.

Table S3. Various parameters incorporated in the proposed translational model. All values were obtained using the QM/PCM technique.

Table S4. Various parameters incorporated in the proposed rotational model. All values were obtained using the QM/PCM technique.

Table S5. Various parameters incorporated in the proposed configurational model. All values were obtained using the QM/PCM technique.

Table S6. Total entropies and respective entropic terms for all reactants, products, and TSs at a concentration of 1 mol dm<sup>-3</sup> based on our proposed method (J mol<sup>-1</sup> K<sup>-1</sup>).

Table S7. Total entropies and respective entropic terms for all reactants, products, and TSs at a concentration of 1 mol dm<sup>-3</sup> based on IGT (J mol<sup>-1</sup> K<sup>-1</sup>).

Table S8. Electric and ZPE energies terms for all reactants, products, and TSs investigated in this study.

Table S9. Total energies and respective energetic terms for all reactants, products, and TSs based on our proposed method (kJ mol<sup>-1</sup>).

Table S10. Total energies and respective energetic terms for all reactants, products, and TSs based on IGT (kJ mol<sup>-1</sup>).

Appendix 1. A model of the restricted rotation of a dipole in an electrostatic field.

Appendix 2. Specific procedure to calculate thermodynamic data using Gaussian program.

Appendix 3. Calculations  $S$  and  $G$  at temperature of 298.15 K and a concentration of  $1 \text{ mol dm}^{-3}$  based on IGT.

Appendix 4. Derivation Eqn (21) from Eqn (22)

Appendix 5. Gibbs energy formalisms based on statistical thermodynamics for nonlocalized and localized system.

Appendix 6. Effect of the choice of the standard state on kinetics in the IGT.

Appendix 7. The rate coefficient calculation ignoring  $w_{PV}$  based on the IGT.

Table S1. Cartesian coordination for all molecules investigated in this study.

| <b>solute</b>   | <b>solvent</b> |             | <b>coordination</b> |             |             |
|-----------------|----------------|-------------|---------------------|-------------|-------------|
| cyclopentadiene | Ethanol        | C           | -1.17321500         | -0.28713400 | -0.00008300 |
|                 |                | C           | -0.73895300         | 0.98437900  | -0.00003600 |
|                 |                | C           | 0.72908500          | 0.99166700  | 0.00005700  |
|                 |                | C           | 1.17599900          | -0.27540600 | 0.00006600  |
|                 |                | H           | -2.20295200         | -0.61899300 | -0.00013900 |
|                 |                | H           | -1.35810000         | 1.87270500  | -0.00006000 |
|                 |                | H           | 1.33928000          | 1.88616200  | 0.00010500  |
|                 |                | H           | 2.20902700          | -0.59686300 | 0.00010700  |
|                 |                | C           | 0.00607100          | -1.21272700 | -0.00000900 |
|                 |                | H           | 0.00935700          | -1.87382500 | 0.87643400  |
| H               | 0.00947200     | -1.87386700 | -0.87641800         |             |             |
| cyclopentadiene | THF            | C           | -1.17563000         | -0.27875700 | -0.00007100 |
|                 |                | C           | -0.73174000         | 0.98949800  | -0.00004000 |
|                 |                | C           | 0.73584700          | 0.98645900  | 0.00004700  |
|                 |                | C           | 1.17447400          | -0.28363500 | 0.00006800  |
|                 |                | H           | -2.20755200         | -0.60350800 | -0.00013300 |
|                 |                | H           | -1.34464100         | 1.88212800  | -0.00007300 |
|                 |                | H           | 1.35246100          | 1.87653000  | 0.00008700  |
|                 |                | H           | 2.20502900          | -0.61270000 | 0.00012800  |
|                 |                | C           | -0.00253100         | -1.21307200 | -0.00000500 |
|                 |                | H           | -0.00396400         | -1.87270900 | 0.87697900  |
| H               | -0.00386000    | -1.87270200 | -0.87699400         |             |             |
| cyclopentadiene | Toluene        | C           | -1.17546500         | -0.27917100 | -0.00007100 |
|                 |                | C           | -0.73208200         | 0.98875000  | -0.00004000 |
|                 |                | C           | 0.73517100          | 0.98646700  | 0.00004700  |
|                 |                | C           | 1.17460000          | -0.28283900 | 0.00006900  |
|                 |                | H           | -2.20730100         | -0.60391200 | -0.00013300 |
|                 |                | H           | -1.34565600         | 1.88078600  | -0.00007300 |
|                 |                | H           | 1.35153800          | 1.87657700  | 0.00008700  |
|                 |                | H           | 2.20540700          | -0.61083200 | 0.00012800  |
|                 |                | C           | -0.00190600         | -1.21307000 | -0.00000500 |
|                 |                | H           | -0.00299700         | -1.87172400 | 0.87774500  |
| H               | -0.00289300    | -1.87171700 | -0.87775900         |             |             |
| cyclopentadiene | Cyclohexane    | C           | -1.17544100         | -0.27922600 | -0.00007100 |

|      |         |   |             |             |             |
|------|---------|---|-------------|-------------|-------------|
|      |         | C | -0.73212900 | 0.98861600  | -0.00004000 |
|      |         | C | 0.73505900  | 0.98645000  | 0.00004700  |
|      |         | C | 1.17462100  | -0.28270600 | 0.00006800  |
|      |         | H | -2.20726500 | -0.60394400 | -0.00013300 |
|      |         | H | -1.34581600 | 1.88054600  | -0.00007300 |
|      |         | H | 1.35139600  | 1.87655200  | 0.00008700  |
|      |         | H | 2.20546800  | -0.61051100 | 0.00012800  |
|      |         | C | -0.00180900 | -1.21306500 | -0.00000500 |
|      |         | H | -0.00284700 | -1.87153200 | 0.87789100  |
|      |         | H | -0.00274300 | -1.87152600 | -0.87790500 |
| TS_A | Ethanol | C | 1.87332500  | -0.80044800 | 0.46655400  |
|      |         | H | 1.70761400  | -1.27173500 | 1.43630000  |
|      |         | H | 2.82299900  | -1.18770900 | 0.06962300  |
|      |         | C | 0.71325600  | 0.11528000  | -1.35845900 |
|      |         | H | 0.24303100  | 0.19325700  | -2.32828900 |
|      |         | C | 0.78228800  | -1.04923900 | -0.56006400 |
|      |         | H | 0.67137400  | -2.03370500 | -1.00358600 |
|      |         | C | 1.36442900  | 1.17094800  | -0.66774900 |
|      |         | H | 1.34950300  | 2.20910000  | -0.97647400 |
|      |         | C | 1.91876600  | 0.69822200  | 0.48431400  |
|      |         | H | 2.45402900  | 1.28221200  | 1.22141300  |
|      |         | C | -0.71325600 | 0.11527900  | 1.35845900  |
|      |         | C | -0.78228800 | -1.04923900 | 0.56006400  |
|      |         | C | -1.91876500 | 0.69822300  | -0.48431300 |
|      |         | H | -0.24303100 | 0.19325600  | 2.32828900  |
|      |         | H | -0.67137400 | -2.03370600 | 1.00358500  |
|      |         | H | -2.45402800 | 1.28221300  | -1.22141300 |
|      |         | C | -1.36442900 | 1.17094800  | 0.66774900  |
|      |         | H | -1.34950200 | 2.20910000  | 0.97647500  |
|      |         | C | -1.87332500 | -0.80044800 | -0.46655400 |
|      |         | H | -1.70761400 | -1.27173500 | -1.43630000 |
|      |         | H | -2.82299900 | -1.18770800 | -0.06962400 |
| TS_A | THF     | C | -0.00399800 | 1.93088100  | -0.80103300 |
|      |         | H | 0.97644600  | 2.00638500  | -1.27344500 |
|      |         | H | -0.62099200 | 2.75540600  | -1.18683100 |
|      |         | C | -1.49080900 | 0.36174600  | 0.11584600  |

|      |         |   |             |             |             |
|------|---------|---|-------------|-------------|-------------|
|      |         | H | -2.31739600 | -0.32976500 | 0.19462900  |
|      |         | C | -0.73474900 | 0.62298800  | -1.04913000 |
|      |         | H | -1.13874700 | 0.40726000  | -2.03324000 |
|      |         | C | -0.97783600 | 1.16092500  | 1.17124800  |
|      |         | H | -1.27259900 | 1.07101100  | 2.20958600  |
|      |         | C | 0.00399800  | 1.97897700  | 0.69774000  |
|      |         | H | 0.58905500  | 2.67753000  | 1.28126900  |
|      |         | C | 1.49080900  | -0.36174600 | 0.11584600  |
|      |         | C | 0.73474900  | -0.62298800 | -1.04913000 |
|      |         | C | -0.00399800 | -1.97897700 | 0.69774000  |
|      |         | H | 2.31739600  | 0.32976500  | 0.19462900  |
|      |         | H | 1.13874700  | -0.40726000 | -2.03324000 |
|      |         | H | -0.58905500 | -2.67753000 | 1.28126900  |
|      |         | C | 0.97783600  | -1.16092500 | 1.17124800  |
|      |         | H | 1.27259900  | -1.07101100 | 2.20958600  |
|      |         | C | 0.00399800  | -1.93088100 | -0.80103300 |
|      |         | H | -0.97644600 | -2.00638500 | -1.27344500 |
|      |         | H | 0.62099200  | -2.75540600 | -1.18683100 |
| TS_A | Toluene | C | -1.87371800 | -0.80029800 | -0.46688100 |
|      |         | H | -1.70751400 | -1.27322500 | -1.43597900 |
|      |         | H | -2.82468200 | -1.18388000 | -0.06965300 |
|      |         | C | -0.71524400 | 0.11490200  | 1.35834800  |
|      |         | H | -0.24894800 | 0.19305200  | 2.32988100  |
|      |         | C | -0.78467500 | -1.04954900 | 0.56148900  |
|      |         | H | -0.67516400 | -2.03380500 | 1.00606100  |
|      |         | C | -1.36350300 | 1.17088100  | 0.66572200  |
|      |         | H | -1.34802500 | 2.20883600  | 0.97427800  |
|      |         | C | -1.91603800 | 0.69845900  | -0.48665900 |
|      |         | H | -2.45022400 | 1.28265100  | -1.22416100 |
|      |         | C | 0.71524400  | 0.11490200  | -1.35834800 |
|      |         | C | 0.78467500  | -1.04954900 | -0.56148900 |
|      |         | C | 1.91603800  | 0.69845900  | 0.48665900  |
|      |         | H | 0.24894800  | 0.19305200  | -2.32988100 |
|      |         | H | 0.67516400  | -2.03380500 | -1.00606100 |
|      |         | H | 2.45022400  | 1.28265100  | 1.22416100  |
|      |         | C | 1.36350300  | 1.17088100  | -0.66572200 |

|                |             |   |             |             |             |
|----------------|-------------|---|-------------|-------------|-------------|
|                |             | H | 1.34802500  | 2.20883600  | -0.97427800 |
|                |             | C | 1.87371800  | -0.80029800 | 0.46688100  |
|                |             | H | 1.70751400  | -1.27322500 | 1.43597900  |
|                |             | H | 2.82468200  | -1.18388000 | 0.06965300  |
| TS_A           | Cyclohexane | C | -1.87374300 | -0.80026500 | -0.46695600 |
|                |             | H | -1.70745400 | -1.27341600 | -1.43596000 |
|                |             | H | -2.82489700 | -1.18334400 | -0.06971700 |
|                |             | C | -0.71551700 | 0.11484100  | 1.35834400  |
|                |             | H | -0.24984000 | 0.19296100  | 2.33015200  |
|                |             | C | -0.78498700 | -1.04959100 | 0.56166600  |
|                |             | H | -0.67566100 | -2.03382500 | 1.00635700  |
|                |             | C | -1.36338000 | 1.17086200  | 0.66546600  |
|                |             | H | -1.34788100 | 2.20878200  | 0.97403000  |
|                |             | C | -1.91562000 | 0.69850400  | -0.48699500 |
|                |             | H | -2.44964000 | 1.28273400  | -1.22455600 |
|                |             | C | 0.71551700  | 0.11484100  | -1.35834400 |
|                |             | C | 0.78498700  | -1.04959100 | -0.56166600 |
|                |             | C | 1.91562000  | 0.69850400  | 0.48699500  |
|                |             | H | 0.24984000  | 0.19296100  | -2.33015200 |
|                |             | H | 0.67566100  | -2.03382500 | -1.00635700 |
|                |             | H | 2.44964000  | 1.28273400  | 1.22455600  |
|                |             | C | 1.36338000  | 1.17086200  | -0.66546600 |
|                |             | H | 1.34788100  | 2.20878200  | -0.97403000 |
|                |             | C | 1.87374300  | -0.80026500 | 0.46695600  |
|                |             | H | 1.70745400  | -1.27341600 | 1.43596000  |
|                |             | H | 2.82489700  | -1.18334400 | 0.06971700  |
| cyclohexadiene | Ethanol     | C | 0.11052700  | 1.41850600  | 0.06324400  |
|                |             | C | 1.25371100  | 0.72571500  | 0.11060900  |
|                |             | C | 1.25404100  | -0.72516600 | -0.11055100 |
|                |             | C | 0.11114500  | -1.41843300 | -0.06335700 |
|                |             | H | 0.11105700  | 2.49657800  | 0.19018800  |
|                |             | H | 2.19932000  | 1.22658700  | 0.29098700  |
|                |             | H | 2.19985100  | -1.22565600 | -0.29097500 |
|                |             | H | 0.11214500  | -2.49650400 | -0.19035700 |
|                |             | C | -1.18879600 | -0.72358800 | 0.25032400  |
|                |             | H | -1.33181000 | -0.73739500 | 1.34138600  |

|                |            |   |             |             |             |
|----------------|------------|---|-------------|-------------|-------------|
|                |            | H | -2.03325000 | -1.27040200 | -0.17559500 |
|                |            | C | -1.18915900 | 0.72305700  | -0.25027300 |
|                |            | H | -2.03380900 | 1.26952800  | 0.17569300  |
|                |            | H | -1.33231800 | 0.73671200  | -1.34129900 |
| cyclohexadiene | Chloroform | C | 0.11076000  | 1.41827600  | 0.06340600  |
|                |            | C | 1.25337100  | 0.72519800  | 0.11091300  |
|                |            | C | 1.25336800  | -0.72520300 | -0.11091300 |
|                |            | C | 0.11075500  | -1.41827700 | -0.06340600 |
|                |            | H | 0.11156500  | 2.49621400  | 0.19105100  |
|                |            | H | 2.19882400  | 1.22580800  | 0.29243900  |
|                |            | H | 2.19881900  | -1.22581700 | -0.29243800 |
|                |            | H | 0.11155500  | -2.49621500 | -0.19105000 |
|                |            | C | -1.18862700 | -0.72289400 | 0.25142300  |
|                |            | H | -1.32934300 | -0.73457800 | 1.34279300  |
|                |            | H | -2.03404800 | -1.26982600 | -0.17274700 |
|                |            | C | -1.18862400 | 0.72289800  | -0.25142400 |
|                |            | H | -2.03404300 | 1.26983400  | 0.17274700  |
|                |            | H | -1.32934000 | 0.73458300  | -1.34279300 |
| cyclohexadiene | benzene    | C | 0.11070500  | 1.41810700  | 0.06346900  |
|                |            | C | 1.25295700  | 0.72501100  | 0.11119400  |
|                |            | C | 1.25294900  | -0.72502400 | -0.11119500 |
|                |            | C | 0.11069000  | -1.41810800 | -0.06346800 |
|                |            | H | 0.11152200  | 2.49591900  | 0.19168500  |
|                |            | H | 2.19815700  | 1.22559200  | 0.29370800  |
|                |            | H | 2.19814300  | -1.22561600 | -0.29370800 |
|                |            | H | 0.11149600  | -2.49592100 | -0.19168400 |
|                |            | C | -1.18832300 | -0.72254100 | 0.25235000  |
|                |            | H | -1.32722600 | -0.73250700 | 1.34395700  |
|                |            | H | -2.03443000 | -1.26972800 | -0.17038000 |
|                |            | C | -1.18831500 | 0.72255300  | -0.25235000 |
|                |            | H | -2.03441700 | 1.26974900  | 0.17038000  |
|                |            | H | -1.32721800 | 0.73252100  | -1.34395700 |
| nitrosobenzene | Ethanol    | C | 1.26978100  | -1.33231400 | -0.00001700 |
|                |            | C | -0.09394100 | -1.09979600 | 0.00000300  |
|                |            | C | -0.55205100 | 0.22008500  | -0.00005400 |
|                |            | C | 0.33233400  | 1.29555900  | 0.00001100  |

|                |            |   |             |             |             |
|----------------|------------|---|-------------|-------------|-------------|
|                |            | C | 1.69973000  | 1.05269400  | 0.00003600  |
|                |            | C | 2.16335000  | -0.25836100 | -0.00002300 |
|                |            | H | 1.64677500  | -2.34809600 | 0.00005300  |
|                |            | H | -0.80788100 | -1.91431000 | 0.00013500  |
|                |            | H | -0.06491800 | 2.30432900  | -0.00000400 |
|                |            | H | 2.40011900  | 1.87891900  | 0.00006800  |
|                |            | H | 3.23019100  | -0.45082800 | -0.00002500 |
|                |            | N | -1.93914700 | 0.57634200  | -0.00001900 |
|                |            | O | -2.71818400 | -0.34645200 | 0.00002100  |
| nitrosobenzene | Chloroform | C | 1.27001900  | -1.33188700 | -0.00000200 |
|                |            | C | -0.09380500 | -1.09894200 | 0.00003200  |
|                |            | C | -0.55160700 | 0.22033800  | -0.00002400 |
|                |            | C | 0.33244500  | 1.29526600  | 0.00002700  |
|                |            | C | 1.69991400  | 1.05237400  | 0.00000500  |
|                |            | C | 2.16369900  | -0.25846000 | -0.00004800 |
|                |            | H | 1.64673000  | -2.34788200 | 0.00008200  |
|                |            | H | -0.80920200 | -1.91226800 | 0.00018200  |
|                |            | H | -0.06599800 | 2.30358600  | 0.00002800  |
|                |            | H | 2.40036300  | 1.87867000  | 0.00000800  |
|                |            | H | 3.23060400  | -0.45098600 | -0.00007000 |
|                |            | N | -1.94135600 | 0.57658600  | 0.00004300  |
|                |            | O | -2.71712300 | -0.34742000 | -0.00005800 |
| nitrosobenzene | benzene    | C | 1.27038200  | -1.33142800 | -0.00001000 |
|                |            | C | -0.09355900 | -1.09813400 | -0.00006300 |
|                |            | C | -0.55115200 | 0.22052600  | -0.00008800 |
|                |            | C | 0.33255000  | 1.29491600  | -0.00001200 |
|                |            | C | 1.70011300  | 1.05211400  | 0.00004400  |
|                |            | C | 2.16413500  | -0.25847200 | 0.00002700  |
|                |            | H | 1.64690600  | -2.34760800 | 0.00004300  |
|                |            | H | -0.81041100 | -1.91030400 | -0.00003900 |
|                |            | H | -0.06723200 | 2.30274300  | 0.00001200  |
|                |            | H | 2.40059100  | 1.87851900  | 0.00009400  |
|                |            | H | 3.23112400  | -0.45097700 | 0.00007200  |
|                |            | N | -1.94379200 | 0.57683500  | -0.00007900 |
|                |            | O | -2.71615600 | -0.34841800 | 0.00012300  |
| TS_B           | Ethanol    | C | 1.34280100  | -1.22480200 | 0.51587100  |



|      |            |   |             |             |             |
|------|------------|---|-------------|-------------|-------------|
|      |            | C | 0.98740800  | -0.24079700 | 1.43117500  |
|      |            | C | 1.48772500  | 1.06914600  | 1.25551000  |
|      |            | C | 2.42066400  | 1.31190100  | 0.29661300  |
|      |            | H | 0.90522300  | -2.21071400 | 0.62507600  |
|      |            | H | 0.16865600  | -0.41488800 | 2.11894200  |
|      |            | H | 1.01092100  | 1.89384900  | 1.77432400  |
|      |            | H | 2.68187600  | 2.33671300  | 0.05188100  |
|      |            | O | 0.85950800  | 0.45146200  | -1.44837900 |
|      |            | N | 0.26739300  | -0.50860900 | -0.92374300 |
|      |            | C | -1.08327400 | -0.20275100 | -0.46532600 |
|      |            | C | -1.89514600 | -1.27883000 | -0.11947900 |
|      |            | C | -1.57811500 | 1.09495800  | -0.45231400 |
|      |            | C | -3.20834500 | -1.04985800 | 0.26648200  |
|      |            | H | -1.49264100 | -2.28557500 | -0.15339500 |
|      |            | C | -2.89392000 | 1.31746100  | -0.06279600 |
|      |            | H | -0.92553300 | 1.90815800  | -0.74497700 |
|      |            | C | -3.70985600 | 0.24981300  | 0.29939100  |
|      |            | H | -3.84422400 | -1.88504700 | 0.53743800  |
|      |            | H | -3.28546300 | 2.32856700  | -0.04369800 |
|      |            | H | -4.73637100 | 0.42765800  | 0.59917200  |
|      |            | C | 3.28702200  | 0.23484700  | -0.28406800 |
|      |            | H | 3.50286300  | 0.47414000  | -1.32646900 |
|      |            | H | 4.24827700  | 0.28069100  | 0.24209100  |
|      |            | C | 2.68792700  | -1.18578000 | -0.16464900 |
|      |            | H | 2.59523500  | -1.65232800 | -1.14789800 |
|      |            | H | 3.35402700  | -1.82450700 | 0.42228200  |
| TS_B | Chloroform | C | 1.34366200  | -1.22826800 | 0.50993200  |
|      |            | C | 0.98732800  | -0.25202400 | 1.43371600  |
|      |            | C | 1.48019500  | 1.06094900  | 1.26254800  |
|      |            | C | 2.40733000  | 1.31295700  | 0.30016700  |
|      |            | H | 0.90952200  | -2.21645800 | 0.61309400  |
|      |            | H | 0.16971500  | -0.43285200 | 2.12108200  |
|      |            | H | 0.99910000  | 1.88089500  | 1.78498700  |
|      |            | H | 2.65977000  | 2.33998400  | 0.05593900  |
|      |            | O | 0.86371100  | 0.45563900  | -1.44218500 |
|      |            | N | 0.27090900  | -0.50607900 | -0.92427900 |

|      |         |   |             |             |             |
|------|---------|---|-------------|-------------|-------------|
|      |         | C | -1.08048900 | -0.20234600 | -0.46639700 |
|      |         | C | -1.89256700 | -1.27868700 | -0.12277400 |
|      |         | C | -1.57495300 | 1.09515800  | -0.45224200 |
|      |         | C | -3.20538700 | -1.05011600 | 0.26388700  |
|      |         | H | -1.49029800 | -2.28539700 | -0.16071700 |
|      |         | C | -2.89051900 | 1.31722900  | -0.06228700 |
|      |         | H | -0.92179800 | 1.90729200  | -0.74654100 |
|      |         | C | -3.70637300 | 0.24953400  | 0.29898000  |
|      |         | H | -3.84195200 | -1.88554200 | 0.53265400  |
|      |         | H | -3.28238200 | 2.32823400  | -0.04319800 |
|      |         | H | -4.73299700 | 0.42713300  | 0.59861100  |
|      |         | C | 3.28157400  | 0.24301000  | -0.28271300 |
|      |         | H | 3.49744700  | 0.48701500  | -1.32392100 |
|      |         | H | 4.24105200  | 0.29116600  | 0.24665900  |
|      |         | C | 2.68885300  | -1.18112400 | -0.17068300 |
|      |         | H | 2.59684600  | -1.64169700 | -1.15680200 |
|      |         | H | 3.35800400  | -1.81995600 | 0.41278300  |
| TS_B | benzene | C | 1.34459500  | -1.23140000 | 0.50463500  |
|      |         | C | 0.98773400  | -0.26226100 | 1.43609600  |
|      |         | C | 1.47406700  | 1.05332000  | 1.26912100  |
|      |         | C | 2.39569200  | 1.31371100  | 0.30349000  |
|      |         | H | 0.91346100  | -2.22154400 | 0.60240500  |
|      |         | H | 0.17146800  | -0.44926700 | 2.12338100  |
|      |         | H | 0.98958500  | 1.86889300  | 1.79529100  |
|      |         | H | 2.64048200  | 2.34271600  | 0.06014900  |
|      |         | O | 0.86732100  | 0.45971200  | -1.43628100 |
|      |         | N | 0.27393200  | -0.50356500 | -0.92465300 |
|      |         | C | -1.07809900 | -0.20180300 | -0.46721300 |
|      |         | C | -1.89033100 | -1.27845400 | -0.12577500 |
|      |         | C | -1.57234600 | 1.09549600  | -0.45197200 |
|      |         | C | -3.20288300 | -1.05042000 | 0.26132200  |
|      |         | H | -1.48811900 | -2.28506400 | -0.16718900 |
|      |         | C | -2.88775500 | 1.31697000  | -0.06173400 |
|      |         | H | -0.91876700 | 1.90683800  | -0.74755700 |
|      |         | C | -3.70349300 | 0.24914000  | 0.29847600  |
|      |         | H | -3.83995600 | -1.88612600 | 0.52812800  |

|                     |              |   |             |             |             |
|---------------------|--------------|---|-------------|-------------|-------------|
|                     |              | H | -3.27994700 | 2.32785700  | -0.04234800 |
|                     |              | H | -4.73019900 | 0.42642500  | 0.59805500  |
|                     |              | C | 3.27653800  | 0.25026600  | -0.28216400 |
|                     |              | H | 3.49150800  | 0.49863800  | -1.32248300 |
|                     |              | H | 4.23485800  | 0.30039800  | 0.24928000  |
|                     |              | C | 2.68960900  | -1.17697100 | -0.17644600 |
|                     |              | H | 2.59786300  | -1.63224500 | -1.16505800 |
|                     |              | H | 3.36169700  | -1.81581000 | 0.40374900  |
| furan               | Acetonitrile | C | -0.00000100 | -0.34712400 | 1.09032500  |
|                     |              | C | -0.00000100 | 0.95461500  | 0.71714400  |
|                     |              | C | -0.00000100 | 0.95461500  | -0.71714400 |
|                     |              | C | -0.00000100 | -0.34712400 | -1.09032500 |
|                     |              | O | 0.00006500  | -1.15246900 | 0.00000000  |
|                     |              | H | -0.00018600 | -0.84430200 | 2.04608200  |
|                     |              | H | -0.00006700 | 1.80923200  | 1.37503500  |
|                     |              | H | -0.00006700 | 1.80923200  | -1.37503500 |
|                     |              | H | -0.00018600 | -0.84430200 | -2.04608200 |
| Maleic<br>anhydride | Acetonitrile | C | -1.12138100 | -0.15534900 | -0.00012900 |
|                     |              | C | 1.12141600  | -0.15530500 | -0.00018400 |
|                     |              | C | 0.66372200  | 1.25908900  | -0.00010900 |
|                     |              | C | -0.66378200 | 1.25910500  | -0.00002400 |
|                     |              | H | 1.35178400  | 2.09076500  | 0.00038000  |
|                     |              | H | -1.35214800 | 2.09051700  | 0.00028800  |
|                     |              | O | -2.22057800 | -0.60841200 | 0.00020500  |
|                     |              | O | 2.22061400  | -0.60835200 | 0.00023800  |
|                     |              | O | 0.00002800  | -0.96155100 | -0.00019100 |
| TS_C                | Acetonitrile | C | -0.08773000 | 1.63308700  | 1.07117600  |
|                     |              | C | 1.23561100  | 1.30358900  | 0.68454300  |
|                     |              | C | 1.23561100  | 1.30358900  | -0.68454300 |
|                     |              | C | -0.08773000 | 1.63308700  | -1.07117600 |
|                     |              | O | -0.72781900 | 2.16778800  | 0.00000000  |
|                     |              | H | -0.44403700 | 1.94815800  | 2.04002500  |
|                     |              | H | 2.02488600  | 0.99784800  | 1.35357000  |
|                     |              | H | 2.02488600  | 0.99784800  | -1.35357000 |
|                     |              | H | -0.44403700 | 1.94815800  | -2.04002500 |
|                     |              | C | -0.11075600 | -1.25667800 | 1.13064800  |

---

|   |             |             |             |
|---|-------------|-------------|-------------|
| C | -1.05711700 | -0.21240200 | 0.70188500  |
| C | -1.05711700 | -0.21240200 | -0.70188500 |
| C | -0.11075600 | -1.25667800 | -1.13064800 |
| H | -1.90675300 | 0.01478400  | 1.32830700  |
| H | -1.90675300 | 0.01478400  | -1.32830700 |
| O | 0.16288600  | -1.67257900 | 2.21656600  |
| O | 0.16288600  | -1.67257900 | -2.21656600 |
| O | 0.51351200  | -1.76422100 | 0.00000000  |

---

Table S2 Rate coefficients for 12 reactions in various solvents based on the proposed method and the IGT technique.

| solute    | solvent      | Temp<br>[K] | $k_{TST}$<br>[dm <sup>3</sup> mol <sup>-1</sup> s <sup>-1</sup> ] | $v^\ddagger$<br>[cm <sup>-1</sup> ] | scaled $v^\ddagger$<br>[cm <sup>-1</sup> ] | $K_{wigner}$ | $k'_{TST\_wigner}$<br>[dm <sup>3</sup> mol <sup>-1</sup> s <sup>-1</sup> ] |
|-----------|--------------|-------------|-------------------------------------------------------------------|-------------------------------------|--------------------------------------------|--------------|----------------------------------------------------------------------------|
| This work |              |             |                                                                   |                                     |                                            |              |                                                                            |
| TS_A      | Ethanol      | 313         | 3.9×10 <sup>-5</sup>                                              | -413.23                             | -392.57                                    | 1.14         | 4.5×10 <sup>-5</sup>                                                       |
| TS_A      | THF          | 313         | 3.8×10 <sup>-5</sup>                                              | -415.96                             | -395.16                                    | 1.14         | 4.4×10 <sup>-5</sup>                                                       |
| TS_A      | Toluene      | 313         | 4.8×10 <sup>-5</sup>                                              | -415.14                             | -394.38                                    | 1.14         | 5.6×10 <sup>-5</sup>                                                       |
| TS_A      | cyclohexane  | 313         | 3.8×10 <sup>-5</sup>                                              | -415.37                             | -394.60                                    | 1.14         | 4.4×10 <sup>-5</sup>                                                       |
| TS_A      | cyclohexane  | 333         | 2.1×10 <sup>-4</sup>                                              | -415.37                             | -394.60                                    | 1.12         | 2.4×10 <sup>-4</sup>                                                       |
| TS_A      | cyclohexane  | 353         | 9.9×10 <sup>-4</sup>                                              | -415.37                             | -394.60                                    | 1.11         | 1.1×10 <sup>-3</sup>                                                       |
| TS_A      | cyclohexane  | 373         | 3.9×10 <sup>-3</sup>                                              | -415.37                             | -394.60                                    | 1.10         | 4.4×10 <sup>-3</sup>                                                       |
| TS_A      | cyclohexane  | 393         | 1.4×10 <sup>-2</sup>                                              | -415.37                             | -394.60                                    | 1.09         | 1.5×10 <sup>-2</sup>                                                       |
| TS_B      | Ethanol      | 298         | 1.5×10 <sup>-1</sup>                                              | -387.72                             | -368.33                                    | 1.13         | 1.7×10 <sup>-1</sup>                                                       |
| TS_B      | Chloroform   | 298         | 3.9×10 <sup>-1</sup>                                              | -387.56                             | -368.18                                    | 1.13         | 4.4×10 <sup>-1</sup>                                                       |
| TS_B      | Benzene      | 298         | 2.0×10 <sup>-1</sup>                                              | -387.23                             | -367.87                                    | 1.13         | 2.3×10 <sup>-1</sup>                                                       |
| TS_C      | Acetonitrile | 300         | 7.4×10 <sup>-4</sup>                                              | -542.07                             | -514.97                                    | 1.25         | 9.0×10 <sup>-4</sup>                                                       |
| IGT       |              |             |                                                                   |                                     |                                            |              |                                                                            |
| TS_A      | Ethanol      | 313         | 2.1×10 <sup>-7</sup>                                              | -413.23                             | -392.57                                    | 1.14         | 2.4×10 <sup>-7</sup>                                                       |
| TS_A      | THF          | 313         | 2.1×10 <sup>-7</sup>                                              | -415.96                             | -395.16                                    | 1.14         | 2.5×10 <sup>-7</sup>                                                       |
| TS_A      | Toluene      | 313         | 2.6×10 <sup>-7</sup>                                              | -415.14                             | -394.38                                    | 1.14         | 3.0×10 <sup>-7</sup>                                                       |
| TS_A      | cyclohexane  | 313         | 2.4×10 <sup>-7</sup>                                              | -415.37                             | -394.60                                    | 1.14         | 2.8×10 <sup>-7</sup>                                                       |
| TS_A      | cyclohexane  | 333         | 1.4×10 <sup>-6</sup>                                              | -415.37                             | -394.60                                    | 1.12         | 1.5×10 <sup>-6</sup>                                                       |
| TS_A      | cyclohexane  | 353         | 6.4×10 <sup>-6</sup>                                              | -415.37                             | -394.60                                    | 1.11         | 7.1×10 <sup>-6</sup>                                                       |
| TS_A      | cyclohexane  | 373         | 2.6×10 <sup>-5</sup>                                              | -415.37                             | -394.60                                    | 1.10         | 2.8×10 <sup>-5</sup>                                                       |
| TS_A      | cyclohexane  | 393         | 8.9×10 <sup>-5</sup>                                              | -415.37                             | -394.60                                    | 1.09         | 9.8×10 <sup>-5</sup>                                                       |
| TS_B      | Ethanol      | 298         | 1.5×10 <sup>-4</sup>                                              | -387.72                             | -368.33                                    | 1.13         | 1.8×10 <sup>-4</sup>                                                       |
| TS_B      | Chloroform   | 298         | 4.0×10 <sup>-4</sup>                                              | -387.56                             | -368.18                                    | 1.13         | 4.6×10 <sup>-4</sup>                                                       |
| TS_B      | Benzene      | 298         | 2.1×10 <sup>-4</sup>                                              | -387.23                             | -367.87                                    | 1.13         | 2.4×10 <sup>-4</sup>                                                       |
| TS_C      | Acetonitrile | 300         | 3.3×10 <sup>-6</sup>                                              | -542.07                             | -514.97                                    | 1.25         | 4.2×10 <sup>-6</sup>                                                       |

Table S3. Various parameters incorporated in the proposed translational model. All values were obtained using the QM/PCM technique.

|                     | solvent      | $q_{\text{elec}}$ | Molecular weight<br>[g mol <sup>-1</sup> ] | $V_{\text{cav}}$<br>[ $\times 10^{-30}$ m <sup>3</sup> ] | $V_{\text{mol}}$<br>[ $\times 10^{-30}$ m <sup>3</sup> ] | $V_{\text{free}}$<br>[ $\times 10^{-31}$ m <sup>3</sup> ] |
|---------------------|--------------|-------------------|--------------------------------------------|----------------------------------------------------------|----------------------------------------------------------|-----------------------------------------------------------|
| Reaction A          |              |                   |                                            |                                                          |                                                          |                                                           |
| cyclopentadiene     | Ethanol      | 1                 | 66.04695                                   | 142.362                                                  | 98.978                                                   | 2.12                                                      |
| TS_A                | Ethanol      | 1                 | 132.0939                                   | 247.281                                                  | 183.772                                                  | 2.07                                                      |
| cyclopentadiene     | THF          | 1                 | 66.04695                                   | 142.362                                                  | 98.978                                                   | 2.12                                                      |
| TS_A                | THF          | 1                 | 132.0939                                   | 247.281                                                  | 183.772                                                  | 2.07                                                      |
| cyclopentadiene     | Toluene      | 1                 | 66.04695                                   | 142.352                                                  | 98.958                                                   | 2.12                                                      |
| TS_A                | Toluene      | 1                 | 132.0939                                   | 247.257                                                  | 183.749                                                  | 2.07                                                      |
| cyclopentadiene     | cyclohexane  | 1                 | 66.04695                                   | 142.349                                                  | 98.955                                                   | 2.11                                                      |
| TS_A                | cyclohexane  | 1                 | 132.0939                                   | 247.254                                                  | 183.745                                                  | 2.06                                                      |
| Reaction B          |              |                   |                                            |                                                          |                                                          |                                                           |
| cyclohexadiene      | Ethanol      | 1                 | 80.0626                                    | 168.541                                                  | 119.565                                                  | 2.13                                                      |
| nitrosobenzene      | Ethanol      | 1                 | 107.0371                                   | 186.126                                                  | 129.604                                                  | 2.73                                                      |
| TS_B                | Ethanol      | 1                 | 187.0997                                   | 320.045                                                  | 236.312                                                  | 2.85                                                      |
| cyclohexadiene      | Chloroform   | 1                 | 80.0626                                    | 168.522                                                  | 119.56                                                   | 2.13                                                      |
| nitrosobenzene      | Chloroform   | 1                 | 107.0371                                   | 186.103                                                  | 129.588                                                  | 2.73                                                      |
| TS_B                | Chloroform   | 1                 | 187.0997                                   | 319.827                                                  | 236.178                                                  | 2.84                                                      |
| cyclohexadiene      | Benzene      | 1                 | 80.0626                                    | 168.541                                                  | 119.565                                                  | 2.13                                                      |
| nitrosobenzene      | Benzene      | 1                 | 107.0371                                   | 186.126                                                  | 129.604                                                  | 2.73                                                      |
| TS_B                | Benzene      | 1                 | 187.0997                                   | 320.045                                                  | 236.312                                                  | 2.85                                                      |
| Reaction C          |              |                   |                                            |                                                          |                                                          |                                                           |
| Furan               | Acetonitrile | 1                 | 68.0626                                    | 128.952                                                  | 87.803                                                   | 2.24                                                      |
| maleic<br>anhydride | Acetonitrile | 1                 | 98.00039                                   | 149.254                                                  | 101.3                                                    | 2.66                                                      |
| TS_C                | Acetonitrile | 1                 | 166.0266                                   | 241.627                                                  | 174.132                                                  | 2.67                                                      |

Table S4. Various parameters incorporated in the proposed rotational model. All values were obtained using the QM/PCM technique.

| solute            | Solvent     | $n_{iso}$ | $\sigma$<br>[-] | $\vartheta_A$<br>[K] | $\vartheta_B$<br>[K] | $\vartheta_C$<br>[K] | $\mu$<br>[debye] | $\mu_p$<br>[debye] | $\alpha$<br>[au] |
|-------------------|-------------|-----------|-----------------|----------------------|----------------------|----------------------|------------------|--------------------|------------------|
| Reaction A        |             |           |                 |                      |                      |                      |                  |                    |                  |
| cyclopentadiene   | Ethanol     | 1         | 2               | 0.40801              | 0.39717              | 0.20656              | 0.68650842       | 0.50780615         | 69.503215        |
| TS_A              | Ethanol     | 2         | 1               | 0.11572              | 0.0641               | 0.06102              | 0.9069           | 0.6011             | 169.8194         |
| cyclopentadiene   | THF         | 1         | 2               | 0.40801              | 0.39717              | 0.20656              | 0.6552015        | 0.50650119         | 67.092076        |
| TS_A              | THF         | 2         | 1               | 0.11572              | 0.0641               | 0.06102              | 0.8467           | 0.5998             | 161.10106        |
| cyclopentadiene   | Toluene     | 1         | 2               | 0.40823              | 0.39706              | 0.20661              | 0.58590069       | 0.50460063         | 61.626987        |
| TS_A              | Toluene     | 2         | 1               | 0.11569              | 0.06412              | 0.06104              | 0.7246           | 0.5971             | 142.70915        |
| cyclopentadiene   | cyclohexane | 1         | 2               | 0.40828              | 0.39706              | 0.20662              | 0.572            | 0.50420063         | 60.52128         |
| TS_A              | cyclohexane | 2         | 1               | 0.11568              | 0.06412              | 0.06104              | 0.7016           | 0.5966             | 139.178          |
| Reaction B        |             |           |                 |                      |                      |                      |                  |                    |                  |
| cyclohexadiene    | Ethanol     | 1         | 2               | 0.2444               | 0.24397              | 0.1297               | 0.70360001       | 0.51570001         | 86.459554        |
| nitrosobenzene    | Ethanol     | 1         | 1               | 0.25379              | 0.07941              | 0.06048              | 4.8877462        | 3.8847496          | 104.42713        |
| TS_B              | Ethanol     | 2         | 1               | 0.08087              | 0.0229               | 0.02146              | 2.7798714        | 1.9490375          | 215.81045        |
| cyclohexadiene    | Chloroform  | 1         | 2               | 0.24446              | 0.24408              | 0.12978              | 0.6472           | 0.5136             | 81.046054        |
| nitrosobenzene    | Chloroform  | 1         | 1               | 0.25392              | 0.07939              | 0.06048              | 4.5971422        | 3.8597695          | 97.269821        |
| TS_B              | Chloroform  | 2         | 1               | 0.08089              | 0.02295              | 0.02151              | 2.479473         | 1.9308477          | 198.49242        |
| cyclohexadiene    | Benzene     | 1         | 2               | 0.2444               | 0.24397              | 0.1297               | 0.593            | 0.512              | 75.828096        |
| nitrosobenzene    | Benzene     | 1         | 1               | 0.25379              | 0.07941              | 0.06048              | 4.2950925        | 3.833294           | 90.320644        |
| TS_B              | Benzene     | 2         | 1               | 0.08087              | 0.0229               | 0.02146              | 2.2265998        | 1.914492           | 182.67083        |
| Reaction C        |             |           |                 |                      |                      |                      |                  |                    |                  |
| Furan             | Acetonitril | 1         | 2               | 0.45656              | 0.44925              | 0.22644              | 0.84630021       | 0.70460018         | 56.037154        |
| maleinic anhydrid | Acetonitril | 1         | 2               | 0.32824              | 0.11996              | 0.08785              | 5.3485           | 4.4905             | 63.461829        |
| TS_C              | Acetonitril | 2         | 1               | 0.06979              | 0.0526               | 0.03901              | 6.4735856        | 5.2332258          | 130.17828        |

Table S5 Various parameters incorporated in the proposed configurational model. All values were obtained using the QM/PCM technique.

|                  | solvent      | concentration<br>[mol dm <sup>-3</sup> ] | V <sub>cavity</sub><br>×10 <sup>-30</sup> [m <sup>3</sup> ] | N <sub>cell</sub><br>×10 <sup>24</sup> | N <sub>solute</sub><br>×10 <sup>23</sup> |
|------------------|--------------|------------------------------------------|-------------------------------------------------------------|----------------------------------------|------------------------------------------|
| Reaction A       |              |                                          |                                                             |                                        |                                          |
| Cyclopentadiene  | Ethanol      | 1                                        | 142.362                                                     | 7.02                                   | 6.02                                     |
| TS_A             | Ethanol      | 1                                        | 247.281                                                     | 4.04                                   | 6.02                                     |
| cyclopentadiene  | THF          | 1                                        | 142.362                                                     | 7.02                                   | 6.02                                     |
| TS_A             | THF          | 1                                        | 247.281                                                     | 4.04                                   | 6.02                                     |
| cyclopentadiene  | Toluene      | 1                                        | 142.352                                                     | 7.02                                   | 6.02                                     |
| TS_A             | Toluene      | 1                                        | 247.257                                                     | 4.04                                   | 6.02                                     |
| cyclopentadiene  | cyclohexane  | 1                                        | 142.349                                                     | 7.02                                   | 6.02                                     |
| TS_A             | cyclohexane  | 1                                        | 247.254                                                     | 4.04                                   | 6.02                                     |
| Reaction B       |              |                                          |                                                             |                                        |                                          |
| cyclohexadiene   | Ethanol      | 1                                        | 168.541                                                     | 5.93                                   | 6.02                                     |
| nitrosobenzene   | Ethanol      | 1                                        | 186.126                                                     | 5.37                                   | 6.02                                     |
| TS_B             | Ethanol      | 1                                        | 320.045                                                     | 3.12                                   | 6.02                                     |
| cyclohexadiene   | Chloroform   | 1                                        | 168.522                                                     | 5.93                                   | 6.02                                     |
| nitrosobenzene   | Chloroform   | 1                                        | 186.103                                                     | 5.37                                   | 6.02                                     |
| TS_B             | Chloroform   | 1                                        | 319.827                                                     | 3.13                                   | 6.02                                     |
| cyclohexadiene   | Benzene      | 1                                        | 168.541                                                     | 5.93                                   | 6.02                                     |
| nitrosobenzene   | Benzene      | 1                                        | 186.126                                                     | 5.37                                   | 6.02                                     |
| TS_B             | Benzene      | 1                                        | 320.045                                                     | 3.12                                   | 6.02                                     |
| Reaction C       |              |                                          |                                                             |                                        |                                          |
| furan            | Acetonitrile | 1                                        | 128.952                                                     | 7.75                                   | 6.02                                     |
| maleic anhydride | Acetonitrile | 1                                        | 149.254                                                     | 6.7                                    | 6.02                                     |
| TS_C             | Acetonitrile | 1                                        | 241.627                                                     | 4.14                                   | 6.02                                     |



Table S6. Total entropies and respective entropic terms for all solutes at a concentration of 1 mol dm<sup>-3</sup> based on our proposed model (J mol<sup>-1</sup> K<sup>-1</sup>).

| solute              | solvent      | T [K] | S <sub>elec</sub> | S <sub>trans</sub> | S <sub>rot</sub> | S <sub>vib</sub> | S <sub>cd</sub> | S <sub>config</sub> | S <sub>tot_calc</sub> |
|---------------------|--------------|-------|-------------------|--------------------|------------------|------------------|-----------------|---------------------|-----------------------|
| cyclopentadiene     | Ethanol      | 313   | 0                 | 52.1               | 97.2             | 19.8             | 0               | 28.4                | 197.5                 |
| TS_A                | Ethanol      | 313   | 0                 | 60.6               | 126.6            | 85.7             | 0               | 23.5                | 296.4                 |
| cyclopentadiene     | THF          | 313   | 0                 | 52.2               | 97.2             | 19.8             | 0               | 28.4                | 197.6                 |
| TS_A                | THF          | 313   | 0                 | 60.6               | 126.7            | 85.0             | 0               | 23.5                | 295.7                 |
| cyclopentadiene     | Toluene      | 313   | 0                 | 52.1               | 97.2             | 19.9             | 0               | 28.4                | 197.6                 |
| TS_A                | Toluene      | 313   | 0                 | 60.6               | 126.6            | 87.6             | 0               | 23.5                | 298.3                 |
| cyclopentadiene     | cyclohexane  | 313   | 0                 | 52.2               | 97.2             | 19.9             | 0               | 28.4                | 197.6                 |
| TS_A                | cyclohexane  | 313   | 0                 | 60.6               | 126.7            | 84.9             | 0               | 23.5                | 295.7                 |
| cyclopentadiene     | cyclohexane  | 333   | 0                 | 52.9               | 98.0             | 23.0             | 0               | 28.4                | 202.4                 |
| TS_A                | cyclohexane  | 333   | 0                 | 61.4               | 127.4            | 93.4             | 0               | 23.5                | 305.7                 |
| cyclopentadiene     | cyclohexane  | 353   | 0                 | 52.9               | 98.0             | 23.0             | 0               | 28.4                | 202.4                 |
| TS_A                | cyclohexane  | 353   | 0                 | 61.4               | 127.4            | 93.4             | 0               | 23.5                | 305.7                 |
| cyclopentadiene     | cyclohexane  | 373   | 0                 | 54.3               | 99.4             | 29.8             | 0               | 28.4                | 211.9                 |
| TS_A                | cyclohexane  | 373   | 0                 | 62.8               | 128.9            | 110.8            | 0               | 23.5                | 326.0                 |
| cyclopentadiene     | cyclohexane  | 393   | 0                 | 55.0               | 100.1            | 33.3             | 0               | 28.4                | 216.8                 |
| TS_A                | cyclohexane  | 393   | 0                 | 63.4               | 129.5            | 119.8            | 0               | 23.5                | 336.2                 |
| cyclohexadiene      | Ethanol      | 298   | 0                 | 54.0               | 102.6            | 33.2             | 0               | 26.9                | 216.8                 |
| nitrosobenzene      | Ethanol      | 298   | 0                 | 59.7               | 101.8            | 51.9             | 0               | 26.0                | 239.3                 |
| TS_B                | Ethanol      | 298   | 0                 | 67.0               | 132.9            | 145.6            | 0               | 21.1                | 366.6                 |
| cyclohexadiene      | Chloroform   | 298   | 0                 | 54.0               | 102.7            | 33.2             | 0               | 26.9                | 216.8                 |
| nitrosobenzene      | Chloroform   | 298   | 0                 | 59.7               | 104.2            | 51.9             | 0               | 26.0                | 241.8                 |
| TS_B                | Chloroform   | 298   | 0                 | 67.0               | 134.6            | 145.0            | 0               | 21.1                | 367.7                 |
| cyclohexadiene      | Benzene      | 298   | 0                 | 54.0               | 102.7            | 33.2             | 0               | 26.9                | 216.8                 |
| nitrosobenzene      | Benzene      | 298   | 0                 | 59.7               | 104.2            | 51.9             | 0               | 26.0                | 241.8                 |
| TS_B                | Benzene      | 298   | 0                 | 67.0               | 135.7            | 144.1            | 0               | 21.1                | 367.9                 |
| furan               | Acetonitrile | 300   | 0                 | 52.5               | 95.2             | 11.2             | 0               | 29.2                | 188.1                 |
| maleic<br>anhydride | Acetonitrile | 300   | 0                 | 58.4               | 88.2             | 34.9             | 0               | 28.0                | 209.5                 |
| TS_C                | Acetonitrile | 300   | 0                 | 65.1               | 108.5            | 98.5             | 0               | 23.7                | 295.8                 |

Table S7. Total entropies and respective entropic terms for all solutes at a concentration of 1 mol dm<sup>-3</sup> based on IGT (J mol<sup>-1</sup> K<sup>-1</sup>).

| solute           | solvent      | T [K] | S <sub>elec</sub> | S <sub>trans</sub> | S <sub>rot</sub> | S <sub>vib</sub> | S <sub>cd</sub> | S <sub>config</sub> | S <sub>tot_calc</sub> |
|------------------|--------------|-------|-------------------|--------------------|------------------|------------------|-----------------|---------------------|-----------------------|
| cyclopentadiene  | Ethanol      | 313   | 0                 | 135.0              | 97.3             | 19.8             | 0               | 0                   | 252.1                 |
| TS_A             | Ethanol      | 313   | 0                 | 143.7              | 126.7            | 85.7             | 0               | 0                   | 356.1                 |
| cyclopentadiene  | THF          | 313   | 0                 | 135.0              | 97.3             | 19.8             | 0               | 0                   | 252.1                 |
| TS_A             | THF          | 313   | 0                 | 143.7              | 126.7            | 85.0             | 0               | 0                   | 355.3                 |
| cyclopentadiene  | Toluene      | 313   | 0                 | 135.0              | 97.3             | 19.9             | 0               | 0                   | 252.2                 |
| TS_A             | Toluene      | 313   | 0                 | 143.7              | 126.7            | 87.6             | 0               | 0                   | 357.9                 |
| cyclopentadiene  | cyclohexane  | 313   | 0                 | 135.0              | 97.3             | 19.9             | 0               | 0                   | 252.2                 |
| TS_A             | cyclohexane  | 313   | 0                 | 143.7              | 126.7            | 84.9             | 0               | 0                   | 355.3                 |
| cyclopentadiene  | cyclohexane  | 333   | 0                 | 135.8              | 98.0             | 23.0             | 0               | 0                   | 256.9                 |
| TS_A             | cyclohexane  | 333   | 0                 | 144.5              | 127.4            | 93.4             | 0               | 0                   | 365.3                 |
| cyclopentadiene  | cyclohexane  | 353   | 0                 | 136.5              | 98.8             | 26.4             | 0               | 0                   | 261.7                 |
| TS_A             | cyclohexane  | 353   | 0                 | 145.2              | 128.2            | 102.0            | 0               | 0                   | 375.4                 |
| cyclopentadiene  | cyclohexane  | 373   | 0                 | 137.2              | 99.4             | 29.8             | 0               | 0                   | 266.5                 |
| TS_A             | cyclohexane  | 373   | 0                 | 145.9              | 128.9            | 110.8            | 0               | 0                   | 385.6                 |
| cyclopentadiene  | cyclohexane  | 393   | 0                 | 137.9              | 100.1            | 33.3             | 0               | 0                   | 271.3                 |
| TS_A             | cyclohexane  | 393   | 0                 | 146.5              | 129.5            | 119.8            | 0               | 0                   | 395.8                 |
| cyclohexadiene   | Ethanol      | 298   | 0                 | 136.8              | 102.7            | 33.2             | 0               | 0                   | 272.8                 |
| nitrosobenzene   | Ethanol      | 298   | 0                 | 140.4              | 116.2            | 51.9             | 0               | 0                   | 308.5                 |
| TS_B             | Ethanol      | 298   | 0                 | 147.4              | 136.2            | 145.6            | 0               | 0                   | 429.2                 |
| cyclohexadiene   | Chloroform   | 298   | 0                 | 136.8              | 102.7            | 33.2             | 0               | 0                   | 272.8                 |
| nitrosobenzene   | Chloroform   | 298   | 0                 | 140.4              | 116.2            | 51.9             | 0               | 0                   | 308.5                 |
| TS_B             | Chloroform   | 298   | 0                 | 147.4              | 136.2            | 145.0            | 0               | 0                   | 428.6                 |
| cyclohexadiene   | Benzene      | 298   | 0                 | 136.8              | 102.7            | 33.2             | 0               | 0                   | 272.8                 |
| nitrosobenzene   | Benzene      | 298   | 0                 | 140.4              | 116.2            | 51.9             | 0               | 0                   | 308.5                 |
| TS_B             | Benzene      | 298   | 0                 | 147.4              | 136.2            | 144.1            | 0               | 0                   | 427.7                 |
| furan            | Acetonitrile | 300   | 0                 | 134.9              | 95.4             | 11.2             | 0               | 0                   | 241.5                 |
| maleic anhydride | Acetonitrile | 300   | 0                 | 139.4              | 106.2            | 34.9             | 0               | 0                   | 280.5                 |
| TS_C             | Acetonitrile | 300   | 0                 | 146.0              | 125.2            | 98.5             | 0               | 0                   | 369.7                 |

Table S8 Electric and ZPE energies terms for all reactants, products, and TSs investigated in this study.

| solute           | solvent      | $E_{\text{elec}}$<br>[kJ mol <sup>-1</sup> ] | $E_{\text{ZPE}}$<br>[kJ mol <sup>-1</sup> ] | $f_{\text{ZPE}}$<br>[-] | $E_0$<br>[kJ mol <sup>-1</sup> ] |
|------------------|--------------|----------------------------------------------|---------------------------------------------|-------------------------|----------------------------------|
| cyclopentadiene  | Ethanol      |                                              | 243.9                                       | 0.975                   |                                  |
| TS_A             | Ethanol      |                                              | 496.4                                       | 0.975                   |                                  |
| cyclopentadiene  | THF          |                                              | 243.9                                       | 0.975                   |                                  |
| TS_A             | THF          |                                              | 496.3                                       | 0.975                   |                                  |
| cyclopentadiene  | Toluene      |                                              | 244.1                                       | 0.975                   |                                  |
| TS_A             | Toluene      |                                              | 496.9                                       | 0.975                   |                                  |
| cyclopentadiene  | cyclohexane  |                                              | 244.1                                       | 0.975                   |                                  |
| TS_A             | cyclohexane  |                                              | 496.9                                       | 0.975                   |                                  |
| cyclohexadiene   | Ethanol      |                                              | 322.7                                       | 0.975                   |                                  |
| nitrosobenzene   | Ethanol      |                                              | 256.9                                       | 0.975                   |                                  |
| TS_B             | Ethanol      |                                              | 586.5                                       | 0.975                   |                                  |
| cyclohexadiene   | Chloroform   |                                              | 322.9                                       | 0.975                   |                                  |
| nitrosobenzene   | Chloroform   |                                              | 256.9                                       | 0.975                   |                                  |
| TS_B             | Chloroform   |                                              | 586.9                                       | 0.975                   |                                  |
| cyclohexadiene   | Benzene      |                                              | 322.9                                       | 0.975                   |                                  |
| nitrosobenzene   | Benzene      |                                              | 256.9                                       | 0.975                   |                                  |
| TS_B             | Benzene      |                                              | 586.9                                       | 0.975                   |                                  |
| furan            | Acetonitrile |                                              | 184.9                                       | 0.975                   |                                  |
| maleic anhydride | Acetonitrile |                                              | 147.6                                       | 0.975                   |                                  |
| TS_C             | Acetonitrile |                                              | 338.3                                       | 0.975                   |                                  |

Table S9 Total energies and respective energetic terms for all reactants, products, and TSs based on our proposed method (kJ mol<sup>-1</sup>).

| solute           | solvent      | Temp | $E_{elec}$ | $E_{trans}$ | $E_{rot}$ | $E_{vib}$ | PV | H           |
|------------------|--------------|------|------------|-------------|-----------|-----------|----|-------------|
| cyclopentadiene  | Ethanol      | 313  | -509306.2  | 3.9         | 4.6       | 242.3     | 0  | -509293.2   |
| TS_A             | Ethanol      | 313  | -1019022.7 | 3.9         | 4.5       | 500.3     | 0  | -1018514.0  |
| cyclopentadiene  | THF          | 313  | -509545.6  | 3.9         | 4.2       | 242.5     | 0  | -509294.8   |
| TS_A             | THF          | 313  | -1019025.3 | 3.9         | 4.2       | 500.7     | 0  | -1018516.7  |
| cyclopentadiene  | Toluene      | 313  | -509306.1  | 3.9         | 4.4       | 242.4     | 0  | -509293.0   |
| TS_A             | Toluene      | 313  | -1019023.5 | 3.9         | 4.4       | 500.3     | 0  | -1018514.8  |
| cyclopentadiene  | cyclohexane  | 313  | -509543.6  | 3.9         | 4.2       | 242.6     | 0  | -509293.0   |
| TS_A             | cyclohexane  | 313  | -1019022.6 | 3.9         | 4.1       | 500.7     | 0  | -1018513.9  |
| cyclopentadiene  | cyclohexane  | 333  | -509543.6  | 4.2         | 4.4       | 243.6     | 0  | -509291.5   |
| TS_A             | cyclohexane  | 333  | -1019022.6 | 4.2         | 4.4       | 503.5     | 0  | -1018510.7  |
| cyclopentadiene  | cyclohexane  | 353  | -509543.6  | 4.4         | 4.7       | 244.7     | 0  | -509289.9   |
| TS_A             | cyclohexane  | 353  | -1019022.6 | 4.4         | 4.6       | 506.4     | 0  | -1018507.2  |
| cyclopentadiene  | cyclohexane  | 373  | -509543.6  | 4.7         | 4.9       | 246.0     | 0  | -509288.1   |
| TS_A             | cyclohexane  | 373  | -1019022.6 | 4.7         | 4.9       | 509.6     | 0  | -1018503.5  |
| cyclopentadiene  | cyclohexane  | 393  | -509543.6  | 4.9         | 5.2       | 247.3     | 0  | -509286.2   |
| TS_A             | cyclohexane  | 393  | -1019022.6 | 4.9         | 5.1       | 513.0     | 0  | -1018499.6  |
| cyclohexadiene   | Ethanol      | 298  | -612756.5  | 3.7         | 4.3       | 321.3     | 0  | -612427.2   |
| nitrosobenzene   | Ethanol      | 298  | -949054.5  | 3.7         | 6.2       | 260.0     | 0  | -948784.7   |
| TS_B             | Ethanol      | 298  | -1561766.1 | 3.7         | 5.9       | 595.6     | 0  | -1561160.8  |
| cyclohexadiene   | Chloroform   | 298  | -612750.0  | 3.7         | 4.1       | 321.4     | 0  | -612420.8   |
| nitrosobenzene   | Chloroform   | 298  | -949046.0  | 3.7         | 6.2       | 260.0     | 0  | -948776.2   |
| TS_B             | Chloroform   | 298  | -1561753.8 | 3.7         | 5.5       | 595.8     | 0  | -1561148.7  |
| cyclohexadiene   | Benzene      | 298  | -612756.1  | 3.7         | 4.0       | 321.5     | 0  | -612426.9   |
| nitrosobenzene   | Benzene      | 298  | -949050.9  | 3.7         | 6.2       | 260.0     | 0  | -948781.0   |
| TS_B             | Benzene      | 298  | -1561762.8 | 3.7         | 4.9       | 595.9     | 0  | -1561157.6  |
| furan            | Acetonitrile | 300  | -603822.2  | 3.7         | 4.5       | 183.0     | 0  | -603631.0   |
| maleic anhydride | Acetonitrile | 300  | -995668.1  | 3.7         | 6.2       | 150.6     | 0  | -995507.5   |
| TS_C             | Acetonitrile | 300  | -1599432.3 | 3.7         | 6.2       | 346.7     | 0  | -1599075.70 |

Table S10 Total energies and respective energetic terms for all reactants, products, and TSs based on IGT (kJ mol<sup>-1</sup>).

| solute           | solvent      | Temp | $E_{elec}$ | $E_{trans}$ | $E_{rot}$ | $E_{vib}$ | PV  | H          |
|------------------|--------------|------|------------|-------------|-----------|-----------|-----|------------|
| cyclopentadiene  | Ethanol      | 313  | -509306.2  | 3.9         | 3.9       | 242.3     | 2.6 | -509291.2  |
| TS_A             | Ethanol      | 313  | -1019022.7 | 3.9         | 3.9       | 500.3     | 2.6 | -1018512.0 |
| cyclopentadiene  | THF          | 313  | -509545.6  | 3.9         | 3.9       | 242.5     | 2.6 | -509292.8  |
| TS_A             | THF          | 313  | -1019025.3 | 3.9         | 3.9       | 500.7     | 2.6 | -1018514.6 |
| cyclopentadiene  | Toluene      | 313  | -509306.1  | 3.9         | 3.9       | 242.4     | 2.6 | -509291.1  |
| TS_A             | Toluene      | 313  | -1019023.5 | 3.9         | 3.9       | 500.3     | 2.6 | -1018512.5 |
| cyclopentadiene  | cyclohexane  | 313  | -509543.6  | 3.9         | 3.9       | 242.6     | 2.6 | -509290.7  |
| TS_A             | cyclohexane  | 313  | -1019022.6 | 3.9         | 3.9       | 500.7     | 2.6 | -1018511.5 |
| cyclopentadiene  | cyclohexane  | 333  | -509543.6  | 4.2         | 4.2       | 243.6     | 2.8 | -509289.0  |
| TS_A             | cyclohexane  | 333  | -1019022.6 | 4.2         | 4.2       | 503.5     | 2.8 | -1018508.1 |
| cyclopentadiene  | cyclohexane  | 353  | -509543.6  | 4.4         | 4.4       | 244.7     | 2.9 | -509287.2  |
| TS_A             | cyclohexane  | 353  | -1019022.6 | 4.4         | 4.4       | 506.4     | 2.9 | -1018504.5 |
| cyclopentadiene  | cyclohexane  | 373  | -509543.6  | 4.7         | 4.7       | 246.0     | 3.1 | -509285.3  |
| TS_A             | cyclohexane  | 373  | -1019022.6 | 4.7         | 4.7       | 509.6     | 3.1 | -1018500.6 |
| cyclopentadiene  | cyclohexane  | 393  | -509543.6  | 4.9         | 4.9       | 247.3     | 3.3 | -509283.2  |
| TS_A             | cyclohexane  | 393  | -1019022.6 | 4.9         | 4.9       | 513.0     | 3.3 | -1018496.5 |
| cyclohexadiene   | Ethanol      | 298  | -612756.5  | 3.7         | 3.7       | 321.3     | 2.5 | -612425.3  |
| nitrosobenzene   | Ethanol      | 298  | -949054.5  | 3.7         | 3.7       | 260.0     | 2.5 | -948784.7  |
| TS_B             | Ethanol      | 298  | -1561766.1 | 3.7         | 3.7       | 595.6     | 2.5 | -1561160.5 |
| cyclohexadiene   | Chloroform   | 298  | -612750.0  | 3.7         | 3.7       | 321.4     | 2.5 | -612418.8  |
| nitrosobenzene   | Chloroform   | 298  | -949046.0  | 3.7         | 3.7       | 260.0     | 2.5 | -948776.2  |
| TS_B             | Chloroform   | 298  | -1561753.8 | 3.7         | 3.7       | 595.8     | 2.5 | -1561148.1 |
| cyclohexadiene   | Benzene      | 298  | -612756.1  | 3.7         | 3.7       | 321.4     | 2.5 | -612424.9  |
| nitrosobenzene   | Benzene      | 298  | -949050.9  | 3.7         | 3.7       | 260.0     | 2.5 | -948781.0  |
| TS_B             | Benzene      | 298  | -1561762.8 | 3.7         | 3.7       | 595.8     | 2.5 | -1561157.3 |
| furan            | Acetonitrile | 300  | -603822.2  | 3.7         | 3.7       | 183.0     | 2.5 | -603629.3  |
| maleic anhydride | Acetonitrile | 300  | -995668.1  | 3.7         | 3.7       | 150.6     | 2.5 | -995507.5  |
| TS_C             | Acetonitrile | 300  | -1599432.3 | 3.7         | 3.7       | 346.7     | 2.5 | -1599075.7 |

Appendix 1. A model of the restricted rotation of a dipole in an electrostatic field.

A rotational term was modeled based on the restricted rotation of a dipole in an electrostatic field as depicted in the figure below.

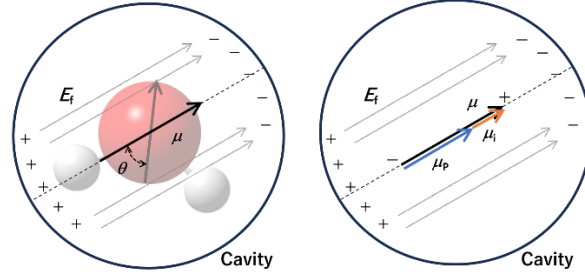

Fig. 2 Diagram summarizing the restricted rotation of a dipole ( $\mu$ ) in an electrostatic field ( $E_f$ ).

The orientation of a rigid rotor can be specified using the Euler angles  $\theta$ ,  $\phi$  and  $\psi$ , which have ranges of 0 to  $\pi$ , 0 to  $2\pi$ , and 0 to  $2\pi$ , respectively. The rotational Hamiltonian for the kinetic energy of such a rotor can be written in terms of these angles and their conjugate momenta ( $p_\theta$ ,  $p_\phi$  and  $p_\psi$ ). Assuming that the dipole moment lies along the molecule-fixed z-axis and the external electric field is collinear, neither  $\psi$  nor  $\phi$  will be included in the Hamiltonian. In this case, the electrostatic restriction on rotation will be along the angle  $\theta$  and the Hamiltonian for a linear, non-linear and polar molecule having dipole moment  $\mu$  in an electric field ( $E_f$ ) can be represented as

$$\mathcal{H}_{\text{rot,linear}} = \frac{1}{2I} \left( p_\theta^2 + \frac{1}{\sin^2 \theta} p_\phi^2 \right) + \mu E_f (1 - \cos \theta) \quad (\text{A1.1})$$

and

$$\begin{aligned} \mathcal{H}_{\text{rot,non-linear}} = & \frac{\sin^2 \psi}{2I_a} \left( p_\theta - \frac{\cos \psi}{\sin \theta \sin \psi} (p_\phi - \cos \theta p_\psi) \right)^2 \\ & + \frac{\cos^2 \psi}{2I_b} \left( p_\theta - \frac{\cos \psi}{\sin \theta \sin \psi} (p_\phi - \cos \theta p_\psi) \right)^2 + \frac{1}{2I_c} p_\psi^2 + \mu E_f (1 - \cos \theta) \end{aligned} \quad (\text{A1.2})$$

The last term in both Eqs. (A1) and (A2) represents the potential energy associated with the molecular dipole in the electric field. In the case that the Hamiltonian is defined, we can obtain classical partition functions based on the integrals

$$q_{\text{rot,linear}} = \frac{1}{\sigma} \int_{-\infty}^{\infty} \int_{-\infty}^{\infty} \int_0^\pi \int_0^{2\pi} \frac{1}{h^2} e^{-\mathcal{H}_{\text{rot}}(p,q)/k_B T} dp_\theta dp_\phi d\theta d\phi \quad (\text{A1.3})$$

and

$$q_{\text{rot,non linear}} = \frac{1}{\sigma} \int_{-\infty}^{\infty} \int_{-\infty}^{\infty} \int_{-\infty}^{\infty} \int_0^\pi \int_0^{2\pi} \int_0^{2\pi} \frac{1}{h^3} e^{-\mathcal{H}_{\text{rot}}(p,q)/k_B T} dp_\theta dp_\phi dp_\psi d\theta d\phi d\psi \quad (\text{A1.4})$$

These integrals can be used to calculate  $q_{\text{rot}}$  as

$$q_{\text{rot,linear}} = \frac{1}{\sigma} \frac{k_B T}{2hcB} \frac{k_B T}{2\mu E} \left[ 1 - \exp\left(-\frac{2\mu E_f}{k_B T}\right) \right] \quad (\text{A1.5})$$

and

$$q_{\text{rot,non linear}} = \frac{1}{\sigma} \left( \frac{k_B T}{hc} \right)^{\frac{3}{2}} \left( \frac{\pi}{\tilde{A}\tilde{B}\tilde{C}} \right)^{\frac{1}{2}} \frac{k_B T}{2\mu E} \left[ 1 - \exp\left(-\frac{2\mu E_f}{k_B T}\right) \right] \quad (\text{A1.6})$$

Based on statistical thermodynamics, the rotational entropy ( $S_{\text{rot.}}$ ) is calculated as

$$S_{\text{rot.}} = \frac{d}{dT} (-RT \ln q_{\text{rot.}}) \quad (\text{A1.7})$$

The entropy value can then be obtained according to the equations

$$S_{\text{rot,linear}} = R \left[ \ln \left\{ \frac{1}{\sigma} \frac{k_B T}{2hcB} [1 - \exp(-X)] \right\} - \frac{X \exp(-X)}{[1 - \exp(-X)]} + 2 \right] \quad (\text{A1.8})$$

and

$$S_{\text{rot,non-linear}} = R \left[ \ln \left\{ \frac{1}{\sigma} \left( \frac{k_B T}{hc} \right)^{\frac{3}{2}} \left( \frac{\pi}{\tilde{A}\tilde{B}\tilde{C}} \right)^{\frac{1}{2}} \frac{1}{X} [1 - \exp(-X)] \right\} - \frac{X \exp(-X)}{[1 - \exp(-X)]} + \frac{5}{2} \right] \quad (\text{A1.9})$$

Where

$$X = \frac{2\mu E_f}{k_B T} \quad (\text{A1.10})$$

A molecule with a polarizability of  $P$  has an induced dipole moment  $\mu_i$ , by the surrounding electric field  $E_f$ , according to:

$$E = \frac{\mu_i}{\alpha} \quad (\text{A1.11})$$

$\mu_i$  is estimated by the difference between  $\mu$  and the permanent dipole moment (the dipole moment without a cavity),  $\mu_p$ :

$$\mu_i = \mu - \mu_p \quad (\text{A1.12})$$

Appendix 2. Specific procedure to calculate thermodynamic data using Gaussian program.

Sample input file for nitrosobenzene.

---

% chk=sample.chk

#p opt freq wb97xd/6-311++g(d,p) scrf=(solvent=ethanol,read)

Title Card Required

0 1

|   |             |             |             |
|---|-------------|-------------|-------------|
| C | 1.26978100  | -1.33231400 | -0.00001700 |
| C | -0.09394100 | -1.09979600 | 0.00000300  |
| C | -0.55205100 | 0.22008500  | -0.00005400 |
| C | 0.33233400  | 1.29555900  | 0.00001100  |
| C | 1.69973000  | 1.05269400  | 0.00003600  |
| C | 2.16335000  | -0.25836100 | -0.00002300 |
| H | 1.64677500  | -2.34809600 | 0.00005300  |
| H | -0.80788100 | -1.91431000 | 0.00013500  |
| H | -0.06491800 | 2.30432900  | -0.00000400 |
| H | 2.40011900  | 1.87891900  | 0.00006800  |
| H | 3.23019100  | -0.45082800 | -0.00002500 |
| N | -1.93914700 | 0.57634200  | -0.00001900 |
| O | -2.71818400 | -0.34645200 | 0.00002100  |

alpha=1.2

--Link1--

% chk=sample.chk

#p wb97xd/6-311++g(d,p) scrf=(solvent=ch3oh,read)

geom=allcheck guess=(read,only)

alpha=1.0





```

Force inversion solution in PCM. ↓
-----
Polarizable Continuum Model (PCM) ↓
-----
Model : PCM. ↓
Atomic radii : UFF (Universal Force Field). ↓
Polarization charges : Total charges. ↓
Charge compensation : None. ↓
Solution method : Matrix inversion. ↓
Cavity type : Scaled VdW (van der Waals Surface) (Alpha=1.200). ↓
Cavity algorithm : GePol (No added spheres). ↓
Default sphere list used. NSphG= 13. ↓
Lebedev-Laikov grids with approx. 5.0 points / Ang**2. ↓
Smoothing algorithm: York/Karplus (Gamma=1.0000). ↓
Polarization charges: spherical gaussians, with ↓
point-specific exponents (IZeta:
). ↓
Self-potential: point-specific (ISelfS= 7). ↓
Self-field : sphere-specific E.n sum rule (ISelfD=
). ↓
1st derivatives : Analytical E(r).r(x)/FMM algorithm (CHGder, D1EAlg=3). ↓
Cavity 1st derivative terms included. ↓
2nd derivatives : Analytical E(r).r(xy)/FMM algorithm (CHGder, D2EAlg=3). ↓
Cavity 2nd derivative terms included. ↓
Solvent : Ethanol. Eps= 24.852000 Eps(inf)= 1.852593 ↓
-----
Spheres list: ↓
ISph on Nord Re0 Alpha Xe Ye Ze ↓
1 C 1 1.9255 1.200 1.269781 -1.332314 -0.000017 ↓
2 C 2 1.9255 1.200 -0.093941 -1.099796 0.000003 ↓
3 C 3 1.9255 1.200 -0.552051 0.220085 -0.000054 ↓
4 C 4 1.9255 1.200 0.332334 1.295559 0.000011 ↓
5 C 5 1.9255 1.200 1.699730 1.052694 0.000036 ↓
6 C 6 1.9255 1.200 2.163350 -0.258361 -0.000023 ↓
7 H 7 1.4430 1.200 1.646775 -2.348096 0.000053 ↓
8 H 8 1.4430 1.200 -0.807881 -1.914310 0.000135 ↓
9 H 9 1.4430 1.200 -0.064918 2.304329 -0.000004 ↓
10 H 10 1.4430 1.200 2.400119 1.878919 0.000068 ↓
11 H 11 1.4430 1.200 3.230191 -0.450828 -0.000025 ↓
12 N 12 1.8300 1.200 -1.939147 0.576342 -0.000019 ↓
13 O 13 1.7500 1.200 -2.718184 -0.346452 0.000021 ↓
-----
GePol: Number of generator spheres = 13 ↓
GePol: Total number of spheres = 13 ↓
GePol: Number of exposed spheres = 13 (100.00%) ↓
GePol: Number of points = 1458 ↓
GePol: Average weight of points = 0.12 ↓
GePol: Minimum weight of points = 0.13D-07 ↓
GePol: Maximum weight of points = 0.21541 ↓
GePol: Number of points with low weight = 75 ↓
GePol: Fraction of low-weight points (<1% of avg) = 5.14% ↓
GePol: Cavity surface area = 177.703 Ang**2 ↓
GePol: Cavity volume = 186.126 Ang**3 ↓ → Vcav = Vf=1.2
Leave Link 301 at Wed Sep 27 12:37:08 2023, MaxMem= 5368709120 cpu:
0.5 elap: 0.1 ↓

```

```

Dipole moment (field-independent basis, Debye): ↓
X= 4.8745 Y= -0.3596 Z= 0.0002 Tot= 4.8877 ← μ
Quadrupole moment (field-independent basis, Debye-Ang): ↓
XX= -50.0176 YY= -40.2756 ZZ= -48.1979 ↓
XY= 0.7053 XZ= 0.0001 YZ= -0.0003 ↓
Traceless Quadrupole moment (field-independent basis, Debye-Ang): ↓
XX= -3.8539 YY= 5.8881 ZZ= -2.0342 ↓
XY= 0.7053 XZ= 0.0001 YZ= -0.0003 ↓
Octapole moment (field-independent basis, Debye-Ang**2): ↓
XXX= 41.5171 YYY= -3.2038 ZZZ= 0.0004 XYY= 5.8825 ↓
XXY= -1.7638 XXZ= 0.0000 XZZ= -8.9925 YZZ= -0.2752 ↓
YYZ= 0.0013 XYZ= 0.0002 ↓
Hexadecapole moment (field-independent basis, Debye-Ang**3): ↓
XXXX= -824.9688 YYYY= -278.4906 ZZZZ= -52.7045 XXXY= 2.4737 ↓
XXXZ= 0.0013 YYYY= 8.3037 YYYZ= -0.0022 ZZZX= -0.0002 ↓
ZZZY= -0.0005 XYYZ= -176.9718 XXZZ= -144.6596 YYZZ= -67.6702 ↓
XXYZ= 0.0002 YYXZ= 0.0005 ZZXY= 1.1951 ↓
N-N= 3.253139460066D+02 E-N=-1.493554951516D+03 KE= 3.601605192425D+02 ↓
Exact polarizability: 150.042 3.518 108.715 0.000 0.000 54.525 ↓ → Avg. α = 104.42
Approx polarizability: 125.640 5.965 99.300 -0.000 0.000 50.880 ↓

```

2. A single point calculation was conducted using PCMs for the structure optimized in step (1) with the same van der Waals radii scaled by  $\alpha = 1.0$ . The result provided  $V_{\alpha=1.0}$  after which the free volume,  $V_{\text{free}}$ , could be calculated as

$$v_{\text{free}} = (V_{\alpha=1.2}^{1/3} - V_{\alpha=1.0}^{1/3})^3.$$

```

-----↓
Polarizable Continuum Model (PCM)↓
=====↓
Model                : PCM.↓
Atomic radii        : UFF (Universal Force Field).↓
Polarization charges: Total charges.↓
Charge compensation  : None.↓
Solution method     : On-the-fly selection.↓
Cavity type         : VdW (van der Waals Surface) (Alpha=1.000).↓
Cavity algorithm    : GePol (No added spheres)↓
                    : Default sphere list used. NSphG= 13.↓
                    : Lebedev-Laikov grids with approx. 5.0 points / Ang**2.↓
                    : Smoothing algorithm: York/Karplus (Gamma=1.0000).↓
                    : Polarization charges: spherical gaussians, with↓
                    : point-specific exponents (IZeta= 3).↓
                    : Self-potential: point-specific (ISelfS= 7).↓
                    : Self-field : sphere-specific E.n sum rule (ISelfD= 2).↓
Solvent              : Ethanol, Eps= 24.852000 Eps (inf)= 1.852593↓
-----↓
Spheres list:↓
ISph on Nord Re0 Alpha Xe Ye Ze↓
 1 C 1 1.9255 1.000 1.269781 -1.332314 -0.000017↓
 2 C 2 1.9255 1.000 -0.093941 -1.099796 0.000003↓
 3 C 3 1.9255 1.000 -0.552051 0.220085 -0.000054↓
 4 C 4 1.9255 1.000 0.332334 1.295559 0.000011↓
 5 C 5 1.9255 1.000 1.699730 1.052694 0.000036↓
 6 C 6 1.9255 1.000 2.163350 -0.258361 -0.000023↓
 7 H 7 1.4430 1.000 1.646775 -2.348096 0.000053↓
 8 H 8 1.4430 1.000 -0.807881 -1.914310 0.000135↓
 9 H 9 1.4430 1.000 -0.064918 2.304329 -0.000004↓
10 H 10 1.4430 1.000 2.400119 1.878919 0.000068↓
11 H 11 1.4430 1.000 3.230191 -0.450828 -0.000025↓
12 N 12 1.8300 1.000 -1.939147 0.576342 -0.000019↓
13 O 13 1.7500 1.000 -2.718184 -0.346452 0.000021↓
-----↓
GePol: Number of generator spheres = 13↓
GePol: Total number of spheres = 13↓
GePol: Number of exposed spheres = 13 (100.00%)↓
GePol: Number of points = 1208↓
GePol: Average weight of points = 0.12↓
GePol: Minimum weight of points = 0.16D-08↓
GePol: Maximum weight of points = 0.22001↓
GePol: Number of points with low weight = 63↓
GePol: Fraction of low-weight points (<1% of avg) = 5.22%↓
GePol: Cavity surface area = 146.528 Ang**2↓
GePol: Cavity volume = 129.604 Ang**3↓ → Vmol = Vf=1.0

```

The translational entropy,  $q_{\text{trans}}$ ,  $S_{\text{trans}}$ , was calculated using the corrected Sackur-Tetrode equation, written as

$$q_{\text{trans}} = \left( v_{\text{free}} \left( \frac{2\pi m k_B T}{h^2} \right)^{\frac{3}{2}} \right)$$

$$E_{\text{trans}} = \frac{3}{2} RT$$

$$S_{\text{trans}} = R \left[ \ln \left( v_{\text{free}} \left( \frac{2\pi m k_B T}{h^2} \right)^{\frac{3}{2}} \right) + \frac{3}{2} \right].$$

Taking nitrosobenzene in ethanol as an example, these calculations become

$$v_{\text{free}} = (V_{a=1.2}^{1/3} - V_{a=1.0}^{1/3})^3 = (186.126^{1/3} - 129.604^{1/3})^3 \times 10^{-30} = 2.73243 \times 10^{-31}$$

and

$$q_{\text{trans}} = \left( v_{\text{free}} \left( \frac{2\pi mk_B T}{h^2} \right)^{\frac{3}{2}} \right)$$

$$= 2.73243 \times 10^{-31} \left( \frac{2\pi \times \frac{107.03711}{6.02 \times 10^{-23} \times 1000} \times 1.38 \times 10^{-23} \times 298.15}{(6.63 \times 10^{-34})^2} \right)^{\frac{3}{2}}$$

$$E_{\text{trans}} = \frac{3}{2} RT$$

$$S_{\text{trans}} = 8.314 \left[ \ln \left( 2.73243 \times 10^{-31} \left( \frac{2\pi \times \frac{107.03711}{6.02 \times 10^{-23} \times 1000} \times 1.38 \times 10^{-23} \times 298.15}{(6.63 \times 10^{-34})^2} \right)^{\frac{3}{2}} \right) + \frac{3}{2} \right]$$

$$= 59.7 \text{ [J mol}^{-1} \text{ K}^{-1}\text{]}.$$



The rotational entropy,  $S_{\text{rot}}$ , could be calculated by inserting the values obtained according to the procedures noted above along with the relevant constants into the equations

$$q_{\text{rot,linear}} = \frac{1}{\sigma} \frac{T}{\theta_B} \frac{1}{X} \{1 - \exp(-X)\}$$

$$E_{\text{rot,linear}} = RT \left\{ 2 - \frac{X \exp(-X)}{1 - \exp(-X)} \right\}$$

$$\begin{aligned} S_{\text{rot,linear}} &= R \left[ \ln \left\{ \frac{1}{\sigma} \frac{k_B T}{2hc\bar{B}} \frac{1 - \exp(-X)}{X} \right\} - \frac{X \exp(-X)}{1 - \exp(-X)} + 2 \right] \\ &= R \left[ \ln \left\{ \frac{1}{\sigma} \frac{T}{\theta_B} \frac{1 - \exp(-X)}{X} \right\} - \frac{X \exp(-X)}{1 - \exp(-X)} + 2 \right] \end{aligned}$$

and

$$q_{\text{rot,non linear}} = \frac{n_{\text{iso}} \sqrt{\pi}}{\sigma} \left( \frac{T^3}{\theta_A \theta_B \theta_C} \right)^{\frac{1}{2}} \frac{1 - \exp(-X)}{X}$$

$$E_{\text{rot,non linear}} = RT \left( \frac{5}{2} - \frac{X \exp(-X)}{1 - \exp(-X)} \right)$$

$$\begin{aligned} S_{\text{rot, non-linear}} &= R \left[ \ln \left\{ \frac{n_{\text{iso}}}{\sigma} \left( \frac{k_B T}{hc} \right)^{\frac{3}{2}} \left( \frac{\pi}{ABC} \right)^{\frac{1}{2}} \frac{1 - \exp(-X)}{X} \right\} - \frac{X \exp(-X)}{1 - \exp(-X)} + \frac{5}{2} \right] \\ &= R \left[ \ln \left\{ \frac{n_{\text{iso}} \sqrt{\pi}}{\sigma} \left( \frac{T^3}{\theta_A \theta_B \theta_C} \right)^{\frac{1}{2}} \frac{1 - \exp(-X)}{X} \right\} - \frac{X \exp(-X)}{1 - \exp(-X)} + \frac{5}{2} \right] \end{aligned}$$

Taking nitrosobenzen as an example, these calculations are

$$\theta_A = 0.25379 \text{ [K]}$$

$$\theta_B = 0.07941 \text{ [K]}$$

$$\theta_C = 0.06048 \text{ [K]}$$

$$X = \frac{2\mu E}{k_B T} = \frac{2 \times 4.89 \times 3.33564 \times 10^{-30} \times 1.94 \times 10^9}{1.381 \times 10^{-23} \times 298} = 15.40 \text{ [-]}$$

and

$$q_{\text{rot,non-linear}} =$$

$$\frac{3.14^{0.5}}{2} \left( \frac{298.15^3}{0.25379 \times 0.07941 \times 0.06048} \right)^{0.5} = 101.8 \text{ [J K}^{-1} \text{ mol}^{-1}\text{].}$$

$$E_{\text{rot,non-linear}} =$$

$$\begin{aligned} &8.314 \times 298.15 \times \left( \frac{5}{2} - \frac{15.40 \exp(-15.40)}{[1 - \exp(-15.40)]} \right) \\ &= 6.197 \text{ [kJ mol}^{-1}\text{].} \end{aligned}$$

$$S_{\text{rot,non-linear}} =$$

$$8.314 \left[ \ln \left\{ \frac{3.14^{0.5}}{2} \left( \frac{298.15^3}{0.25379 \times 0.07941 \times 0.06048} \right)^{0.5} \frac{1 - \exp(-15.40)}{15.40} \right\} - \frac{15.40 \exp(-15.40)}{1 - \exp(-15.40)} + \frac{5}{2} \right]$$
$$= 101.8 \text{ [J mol}^{-1} \text{ K}^{-1}\text{]}.$$



4. The vibrational terms without scaling parameters could be obtained from the thermochemistry output file.

In the case of nitrosobenzene in ethanol, this file was as follows.

$$q_{\text{vib}} = 9.23499$$

$$E_{\text{zpe}} = 0.097852 \times 2625.506 \text{ [kJ mol}^{-1}] = 256.9 \text{ [kJ mol}^{-1}]$$

$$E_{\text{vib}} = 63.51 \text{ [kcal mol}^{-1}] = 265.7 \text{ [kJ mol}^{-1}]$$

$$S_{\text{vib}} = 11.489 \text{ [cal mol}^{-1} \text{ K}^{-1}] = 48.1 \text{ [J mol}^{-1} \text{ K}^{-1}]$$

|   |                                              |                                 |                             |                           |
|---|----------------------------------------------|---------------------------------|-----------------------------|---------------------------|
| 7 | Zero-point correction=                       |                                 | 0.097852 (Hartree/Particle) | ← $E_{\text{ZPE}}$        |
| 8 | Thermal correction to Energy=                |                                 | 0.104044                    |                           |
| 9 | Thermal correction to Enthalpy=              |                                 | 0.104988                    |                           |
| 0 | Thermal correction to Gibbs Free Energy=     |                                 | 0.067368                    |                           |
| 1 | Sum of electronic and zero-point Energies=   |                                 | -361.411237                 |                           |
| 2 | Sum of electronic and thermal Energies=      |                                 | -361.405045                 |                           |
| 3 | Sum of electronic and thermal Enthalpies=    |                                 | -361.404100                 |                           |
| 4 | Sum of electronic and thermal Free Energies= |                                 | -361.441720                 |                           |
| 5 | ↓                                            |                                 |                             |                           |
| 6 |                                              | E (Thermal)                     | CV                          | S↓                        |
| 7 |                                              | KCal/Mol                        | Cal/Mol-Kelvin              | Cal/Mol-Kelvin↓           |
| 8 | Total                                        | 65.289                          | 23.235                      | 79.178↓                   |
| 9 | Electronic                                   | 0.000                           | 0.000                       | 0.000↓                    |
| 0 | Translational                                | 0.889                           | 2.981                       | 39.921↓                   |
| 1 | Rotational                                   | 0.889                           | 2.981                       | 27.769↓                   |
| 2 | Vibrational                                  | 63.511 ← $E_{\text{vib}}$       | 17.274                      | 11.489 ← $S_{\text{vib}}$ |
| 3 | Vibration 1                                  | 0.605                           | 1.946                       | 3.369↓                    |
| 4 | Vibration 2                                  | 0.663                           | 1.762                       | 1.729↓                    |
| 5 | Vibration 3                                  | 0.667                           | 1.748                       | 1.671↓                    |
| 6 | Vibration 4                                  | 0.783                           | 1.427                       | 0.892↓                    |
| 7 | Vibration 5                                  | 0.814                           | 1.348                       | 0.778↓                    |
| 8 | Vibration 6                                  | 0.830                           | 1.310                       | 0.730↓                    |
| 9 | ↓                                            |                                 |                             |                           |
| 0 |                                              | Q                               | Log10(Q)                    | Ln(Q) ↓                   |
| 1 | Total Bot                                    | 0.103009D-30                    | -30.987126                  | -71.350494↓               |
| 2 | Total V=0                                    | 0.105059D+15                    | 14.021435                   | 32.285548↓                |
| 3 | Vib (Bot)                                    | 0.905473D-44                    | -44.043124                  | -101.413042↓              |
| 4 | Vib (Bot) 1                                  | 0.196255D+01                    | 0.292821                    | 0.674245↓                 |
| 5 | Vib (Bot) 2                                  | 0.779879D+00                    | -0.107973                   | -0.248616↓                |
| 6 | Vib (Bot) 3                                  | 0.751707D+00                    | -0.123951                   | -0.285408↓                |
| 7 | Vib (Bot) 4                                  | 0.417918D+00                    | -0.378909                   | -0.872469↓                |
| 8 | Vib (Bot) 5                                  | 0.374406D+00                    | -0.426657                   | -0.982414↓                |
| 9 | Vib (Bot) 6                                  | 0.355865D+00                    | -0.448715                   | -1.033204↓                |
| 0 | Vib (V=0)                                    | 0.923499D+01 ← $q_{\text{vib}}$ | 0.965437                    | 2.223000↓                 |
| 1 | Vib (V=0) 1                                  | 0.252524D+01                    | 0.402303                    | 0.926337↓                 |
| 2 | Vib (V=0) 2                                  | 0.142640D+01                    | 0.154241                    | 0.355152↓                 |
| 3 | Vib (V=0) 3                                  | 0.140281D+01                    | 0.146998                    | 0.338477↓                 |
| 4 | Vib (V=0) 4                                  | 0.115166D+01                    | 0.061323                    | 0.141201↓                 |
| 5 | Vib (V=0) 5                                  | 0.112464D+01                    | 0.051015                    | 0.117466↓                 |
| 6 | Vib (V=0) 6                                  | 0.111371D+01                    | 0.046772                    | 0.107697↓                 |
| 7 | Electronic                                   | 0.100000D+01                    | 0.000000                    | 0.000000↓                 |
| 8 | Translational                                | 0.435267D+08                    | 7.638755                    | 17.588884↓                |
| 9 | Rotational                                   | 0.261362D+06                    | 5.417243                    | 12.473663↓                |

Applying  $f_{\text{vib}}$  and  $f_{\text{zpe}}$ , we can obtain scaled parameters.

$$q_{\text{vib scaled}} = 11.139$$

$$E_{\text{zpe scaled}} = 250.5 \text{ [kJ mol}^{-1}]$$

$$E_{\text{vib scaled}} = 63.51 \text{ [kcal mol}^{-1}] = 259.97 \text{ [kJ mol}^{-1}]$$

$$S_{\text{vib scaled}} = 51.87 \text{ [J mol}^{-1} \text{ K}^{-1}]$$



5. The configurational entropy at a concentration of  $C$  was calculated from  $V_{\text{cav}}$  and  $V_{\text{solute}}$ . As an example, for a solute at a concentration of  $1 \text{ mol dm}^{-3}$  in a solvent volume of  $1 \text{ dm}^3$ , we have the following.

$$C = 1 \text{ [mol dm}^{-3}\text{]},$$

$$V_{\text{solution}} = 1 \text{ [dm}^3\text{]},$$

$$N_{\text{solute}} = C \cdot L \cdot V_{\text{solution}} = 1 \text{ [mol dm}^{-3}\text{]} \times 6.02 \times 10^{23} \text{ [mol}^{-1}\text{]} \times 1 \text{ [dm}^3\text{]} = 6.02 \times 10^{23},$$

$$N_{\text{cells}} = \frac{V_{\text{solution}}}{V_{\text{cav}}} = \frac{1 \times 10^{27} \text{ [\AA}^3\text{]}}{186.126 \text{ [\AA}^3\text{]}} = 5.3727 \times 10^{24}$$

and

$$q_{\text{config}} \approx \exp \left\{ \frac{N_{\text{cell}}}{N_{\text{solute}}} \ln \frac{N_{\text{cell}}}{N_{\text{solute}}} - \left( \frac{N_{\text{cell}}}{N_{\text{solute}}} - 1 \right) \ln \left( \frac{N_{\text{cell}}}{N_{\text{solute}}} - 1 \right) \right\}$$

$$= \exp \left\{ \frac{5.37 \times 10^{23}}{6.02 \times 10^{23}} \ln \frac{5.37 \times 10^{23}}{6.02 \times 10^{23}} - \left( \frac{5.37 \times 10^{23}}{6.02 \times 10^{23}} - 1 \right) \ln \left( \frac{5.37 \times 10^{23}}{6.02 \times 10^{23}} - 1 \right) \right\} = 22.9 \text{ [-]}$$

$$E_{\text{config}} = 0 \text{ [kJ mol}^{-1}\text{]}$$

$$S_{\text{config}} = 8.314 \text{ [J mol}^{-1} \text{ K}^{-1}\text{]} \times 22.9 = 26.0 \text{ [J mol}^{-1} \text{ K}^{-1}\text{]}$$

6. Finally, the entropic terms obtained as noted above are summed.

Using nitrosobenzene as an example, this summation would be

$$H = U = E_{\text{elec}} + E_{\text{trans}} + E_{\text{rot}} + E_{\text{vib}} + E_{\text{config}}$$

$$= E_{\text{elec}} + 3.7 + 6.2 + 260.0 + 0 = E_{\text{elec}} + 269.9$$

$$S = S_{\text{elec}} + S_{\text{trans}} + S_{\text{rot}} + S_{\text{vib}} + S_{\text{config}}$$

$$= 0 + 59.7 + 101.8 + 51.9 + 26.0 = 239.3$$

Appendix 3. Calculations  $S$  and  $G$  at temperature of 298.15 K and a concentration of 1 mol dm<sup>-3</sup> based on IGT.

The partition function and entropy at 1 atm and 298.15 K can be written as:

$$q_{\text{trans\_IGT at 1 atm}} = V \left( \frac{2\pi mk_B T}{h^2} \right)^{\frac{3}{2}} = \frac{RT}{p} \left( \frac{2\pi mk_B T}{h^2} \right)^{\frac{3}{2}} = \frac{8.314 \times 298.15}{101300} \left( \frac{2\pi mk_B T}{h^2} \right)^{\frac{3}{2}},$$

$$S_{\text{trans\_IGT at 1 atm}} = R \left[ \ln \left\{ \frac{8.314 \times 298.15}{101300 \times N_A} \left( \frac{2\pi mk_B T}{h^2} \right)^{\frac{3}{2}} \right\} + \frac{5}{2} \right].$$

A pressure of 24.5 (24.47) atm in a volume of 1 dm<sup>3</sup> corresponds to a concentration of 1 mol dm<sup>-3</sup> at 298.15 K based on the ideal gas equation of state.

$$q_{\text{trans\_IGT at 1 mol dm}^{-3}} = V \left( \frac{2\pi mk_B T}{h^2} \right)^{\frac{3}{2}} = \frac{8.314 \times 298.15}{24.47 \times 101300} \left( \frac{2\pi mk_B T}{h^2} \right)^{\frac{3}{2}} = 0.001 \left( \frac{2\pi mk_B T}{h^2} \right)^{\frac{3}{2}}$$

$$S_{\text{trans\_IGT at 1 mol dm}^{-3}} = R \left[ \ln \left\{ \frac{0.001}{N_A} \left( \frac{2\pi mk_B T}{h^2} \right)^{\frac{3}{2}} \right\} + \frac{5}{2} \right].$$

Consequently, the  $S$  and  $G$  corrections for converting the state at 1 atm to 1 mol dm<sup>-3</sup> at 298.15 K can be calculated as -26.78 J mol<sup>-1</sup> K<sup>-1</sup> and +7.98 J mol<sup>-1</sup>.

$$\begin{aligned} \Delta S(1 \text{ atm} \rightarrow 1 \text{ mol dm}^3) &= S_{\text{trans\_IGT at 1 mol dm}^{-3}} - S_{\text{trans\_IGT at 1 atm}} \\ &= R \ln \frac{101300 \times 0.001}{8.314 \times 298.15} = -26.6 \text{ [J mol}^{-1} \text{ K}^{-1}] \end{aligned}$$

$$\begin{aligned} \Delta G(1 \text{ atm} \rightarrow 1 \text{ mol dm}^3) &= -T\Delta S(1 \text{ atm} \rightarrow 1 \text{ mol dm}^3) = -298.15 \times -26.58 \\ &= 7.93 \text{ [kJ mol}^{-1}] \end{aligned}$$

Appendix 4. Derivation Eqn (21) from Eqn (22)

$$q_{\text{configuration}} = W^{\frac{1}{N_{\text{solute}}}} = \left( \frac{N_{\text{cell}}!}{N_{\text{solute}}!(N_{\text{cell}}-N_{\text{solute}})!} \right)^{\frac{1}{N_{\text{solute}}}}$$

$$\ln q_{\text{configuration}} = \frac{1}{N_{\text{solute}}} \ln \left( \frac{N_{\text{cell}}!}{N_{\text{solute}}!(N_{\text{cell}}-N_{\text{solute}})!} \right)$$

Applying the approximation ( $N \ln N - N \approx \ln N!$ ) gives

$$\begin{aligned} \ln q_{\text{config}} &= \frac{1}{N_{\text{solute}}} \ln [N_{\text{cell}}! - \{N_{\text{solute}}! + (N_{\text{cell}} - N_{\text{solute}})!\}] \\ &= \frac{1}{N_{\text{solute}}} [N_{\text{cell}} \ln N_{\text{cell}} - N_{\text{cell}} - \{N_{\text{solute}} \ln N_{\text{solute}} - N_{\text{solute}} + (N_{\text{cell}} - N_{\text{solute}}) \ln(N_{\text{cell}} - N_{\text{solute}}) - (N_{\text{cell}} - N_{\text{solute}})\}] \\ &= \frac{1}{N_{\text{solute}}} [N_{\text{cell}} \ln N_{\text{cell}} - \{N_{\text{solute}} \ln N_{\text{solute}} + (N_{\text{cell}} - N_{\text{solute}}) \ln(N_{\text{cell}} - N_{\text{solute}})\}] \\ &= \frac{1}{N_{\text{solute}}} \left[ N_{\text{cell}} \ln N_{\text{cell}} - \left\{ N_{\text{solute}} \ln N_{\text{solute}} + N_{\text{solute}} \left( \frac{N_{\text{cell}}}{N_{\text{solute}}} - 1 \right) \ln N_{\text{solute}} \left( \frac{N_{\text{cell}}}{N_{\text{solute}}} - 1 \right) \right\} \right] \\ &= \frac{1}{N_{\text{solute}}} \left[ N_{\text{cell}} \ln N_{\text{cell}} - N_{\text{solute}} \ln N_{\text{solute}} - N_{\text{solute}} \left( \frac{N_{\text{cell}}}{N_{\text{solute}}} - 1 \right) \ln N_{\text{solute}} \left( \frac{N_{\text{cell}}}{N_{\text{solute}}} - 1 \right) \right] \\ &= \frac{N_{\text{cell}}}{N_{\text{solute}}} \ln N_{\text{cell}} - \ln N_{\text{solute}} - \left( \frac{N_{\text{cell}}}{N_{\text{solute}}} - 1 \right) \ln N_{\text{solute}} \left( \frac{N_{\text{cell}}}{N_{\text{solute}}} - 1 \right) \\ &= \frac{N_{\text{cell}}}{N_{\text{solute}}} \ln N_{\text{cell}} - \ln N_{\text{solute}} - \left( \frac{N_{\text{cell}}}{N_{\text{solute}}} - 1 \right) \ln N_{\text{solute}} - \left( \frac{N_{\text{cell}}}{N_{\text{solute}}} - 1 \right) \ln \left( \frac{N_{\text{cell}}}{N_{\text{solute}}} - 1 \right) \\ &= \frac{N_{\text{cell}}}{N_{\text{solute}}} \ln N_{\text{cell}} - \ln N_{\text{solute}} - \frac{N_{\text{cell}}}{N_{\text{solute}}} \ln N_{\text{solute}} + \ln N_{\text{solute}} - \left( \frac{N_{\text{cell}}}{N_{\text{solute}}} - 1 \right) \ln \left( \frac{N_{\text{cell}}}{N_{\text{solute}}} - 1 \right) \\ &= \frac{N_{\text{cell}}}{N_{\text{solute}}} \ln N_{\text{cell}} - \frac{N_{\text{cell}}}{N_{\text{solute}}} \ln N_{\text{solute}} - \left( \frac{N_{\text{cell}}}{N_{\text{solute}}} - 1 \right) \ln \left( \frac{N_{\text{cell}}}{N_{\text{solute}}} - 1 \right) \\ &= \frac{N_{\text{cell}}}{N_{\text{solute}}} \ln \frac{N_{\text{cell}}}{N_{\text{solute}}} - \left( \frac{N_{\text{cell}}}{N_{\text{solute}}} - 1 \right) \ln \left( \frac{N_{\text{cell}}}{N_{\text{solute}}} - 1 \right) \end{aligned}$$

$$\ln q_{\text{config}} = \frac{N_{\text{cell}}}{N_{\text{solute}}} \ln \frac{N_{\text{cell}}}{N_{\text{solute}}} - \left( \frac{N_{\text{cell}}}{N_{\text{solute}}} - 1 \right) \ln \left( \frac{N_{\text{cell}}}{N_{\text{solute}}} - 1 \right)$$

$$\leftrightarrow q_{\text{config}} = \exp \left\{ \frac{N_{\text{cell}}}{N_{\text{solute}}} \ln \frac{N_{\text{cell}}}{N_{\text{solute}}} - \left( \frac{N_{\text{cell}}}{N_{\text{solute}}} - 1 \right) \ln \left( \frac{N_{\text{cell}}}{N_{\text{solute}}} - 1 \right) \right\}$$

Appendix 5 Gibbs energy formalisms based on statistical thermodynamics for nonlocalized and localized system.

Based on statistical thermodynamics, the Gibbs energy at a temperature  $T$  can be defined in terms of a canonical partition function,  $Q$ , as:

$$G(T) = G(0 \text{ K}) - k_B T \ln Q + PV. \quad (\text{A6.1})$$

The  $Q$  value for independent and indistinguishable molecules (that is, a nonlocalized system) is obtained from the molecular partition function as:

$$Q = \frac{1}{N!} q^N. \quad (\text{A6.2})$$

Substituting this relationship into Eq. (A6.1) gives:

$$G = G(0 \text{ K}) - k_B T \ln \frac{1}{N!} q^N + PV. \quad (\text{A6.3})$$

Applying the Stirling's approximation to Eq. (A6.3) then provides:

$$\begin{aligned} G &= G(0 \text{ K}) - k_B N T \ln q + k_B T \ln \frac{1}{N!} + PV \\ &= G(0 \text{ K}) - k_B N T \ln q + k_B N T \ln N - k_B N T + PV \\ &= G(0 \text{ K}) - nRT \ln q + nRT \ln N - nRT + nRT \\ &= G(0 \text{ K}) - nRT \ln \frac{q}{N}. \end{aligned} \quad (\text{A6.4})$$

On this basis, the standard molar Gibbs energy ( $G_m^\circ$ ) can be defined in terms of a molar partition function at the standard state ( $q^\circ$ ) as:

$$G_m^\circ(T) = G_m^\circ(0 \text{ K}) - RT \ln \frac{q^\circ}{L}. \quad (\text{A6.5})$$

Here, we consider a general chemical reaction:

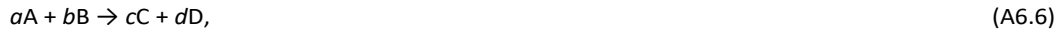

where A, B, C and D are the reactants or products of the reaction and  $a$ ,  $b$ ,  $c$  and  $d$  are the stoichiometric coefficients. In this case, the change in  $G$  for the reaction between reactants in their standard states at the same temperature ( $\Delta_r G^\circ$ ) will be:

$$\begin{aligned} \Delta_r G^\circ &= cG_m^\circ(C, T) + dG_m^\circ(D, T) - \{aG_m^\circ(A, T) + bG_m^\circ(B, T)\} \\ &= cG_m^\circ(C, 0 \text{ K}) + dG_m^\circ(D, 0 \text{ K}) - \{aG_m^\circ(A, 0 \text{ K}) + bG_m^\circ(B, 0 \text{ K})\} - RT \left\{ c \ln \frac{q_C^\circ}{L} + d \ln \frac{q_D^\circ}{L} - a \ln \frac{q_A^\circ}{L} - b \ln \frac{q_B^\circ}{L} \right\} \end{aligned}$$

$$= \Delta_r G(0 \text{ K}) - RT \left\{ c \ln \frac{q_C^\circ}{L} + d \ln \frac{q_D^\circ}{L} - a \ln \frac{q_A^\circ}{L} - b \ln \frac{q_B^\circ}{L} \right\} . \quad (\text{A6.7})$$

Because  $\Delta_r G(0 \text{ K})$  is equal to the potential energy,  $\Delta_r E_0$ , the above becomes:

$$\begin{aligned} \Delta_r G^\circ &= \Delta_r E_0 - RT \left\{ c \ln \frac{q_C^\circ}{L} + d \ln \frac{q_D^\circ}{L} - a \ln \frac{q_A^\circ}{L} - b \ln \frac{q_B^\circ}{L} \right\} \\ &= \Delta_r E_0 - RT \ln \frac{\left(\frac{q_C^\circ}{L}\right)^c \left(\frac{q_D^\circ}{L}\right)^d}{\left(\frac{q_A^\circ}{L}\right)^a \left(\frac{q_B^\circ}{L}\right)^b} \\ \Leftrightarrow \frac{\Delta_r G^\circ}{RT} &= \frac{\Delta_r E_0}{RT} - \ln \frac{\left(\frac{q_C^\circ}{L}\right)^c \left(\frac{q_D^\circ}{L}\right)^d}{\left(\frac{q_A^\circ}{L}\right)^a \left(\frac{q_B^\circ}{L}\right)^b} . \end{aligned} \quad (\text{A6.8})$$

Taking the exponential of both sides, we obtain the relationship:

$$\frac{\left(\frac{q_C^\circ}{L}\right)^c \left(\frac{q_D^\circ}{L}\right)^d}{\left(\frac{q_A^\circ}{L}\right)^a \left(\frac{q_B^\circ}{L}\right)^b} \exp\left(-\frac{\Delta_r E_0}{RT}\right) = \exp\left(-\frac{\Delta_r G^\circ}{RT}\right). \quad (\text{A6.9})$$

In contrast,  $Q$  for independent and distinguishable molecules (that is, a localized system) is obtained from the molecular partition function as:

$$Q = q^N . \quad (\text{A6.10})$$

In the liquid phase,  $PV$  is assumed to be zero. On this basis,  $G_m^\circ$  can be defined as:

$$G_m^\circ(T) = G_m^\circ(0 \text{ K}) - nRT \ln q^\circ . \quad (\text{A6.11})$$

The change in Gibbs energy for the reaction in Eq. (A6.6),  $\Delta_r G^\circ$ , will then be:

$$\begin{aligned} \Delta_r G^\circ &= cG_m^\circ(\text{C}, 0 \text{ K}) + dG_m^\circ(\text{D}, 0 \text{ K}) - \{aG_m^\circ(\text{A}, 0 \text{ K}) + bG_m^\circ(\text{B}, 0 \text{ K})\} - RT \{c \ln q_C^\circ + d \ln q_D^\circ - a \ln q_A^\circ - b \ln q_B^\circ\} \\ &= \Delta_r E_0 - RT \ln \frac{\left(\frac{q_C^\circ}{L}\right)^c \left(\frac{q_D^\circ}{L}\right)^d}{\left(\frac{q_A^\circ}{L}\right)^a \left(\frac{q_B^\circ}{L}\right)^b} \\ \Leftrightarrow -\frac{\Delta_r G^\circ}{RT} &= -\frac{\Delta_r E_0}{RT} + \ln \frac{\left(\frac{q_C^\circ}{L}\right)^c \left(\frac{q_D^\circ}{L}\right)^d}{\left(\frac{q_A^\circ}{L}\right)^a \left(\frac{q_B^\circ}{L}\right)^b} . \end{aligned} \quad (\text{A6.12})$$

Taking the exponential of both sides gives:

$$\frac{(q_C^\circ)^c (q_D^\circ)^d}{(q_A^\circ)^a (q_B^\circ)^b} \exp\left(-\frac{\Delta_r E_0}{RT}\right) = \exp\left(-\frac{\Delta_r G^\circ}{RT}\right). \quad (\text{A6.13})$$

Appendix 6 Effect of the choice of the standard state on kinetics in the IGT.

In the IGT model, regardless of the chosen standard state (whether it is 1 atm or 1 mol dm<sup>-3</sup>), the same rate coefficient will be obtained if calculated consistently for that standard state. In the IGT model, the standard state is represented by defining the volume, so the partition function per unit volume is equal, regardless of the chosen standard state. As an example, in the case of calculations involving reaction A, the rate coefficients obtained from transition state theory are also equal, as shown below.

$$k_{\text{TST}} = L \frac{k_{\text{B}}T}{h} \frac{\frac{q_{\text{TS}}^{\circ}}{V_{\text{TS}}^{\circ}}}{\frac{q_{\text{A}}^{\circ} q_{\text{B}}^{\circ}}{V_{\text{A}} V_{\text{B}}}} \exp\left(-\frac{\Delta E_0^{\ddagger}}{RT}\right)$$

$$= 6.02 \times 10^{23} [\text{mol}^{-1}] \times \frac{1.3806 \times 10^{-23} [\text{m}^2 \text{ kg s}^{-2} \text{ K}^{-1}] \times 313 [\text{K}]}{6.626 \times 10^{-34} [\text{m}^2 \text{ kg s}^{-1}]} \times \frac{8.43 \times 10^{40} [\text{m}^{-3}]}{2.81 \times 10^{37} [\text{m}^{-3}] \cdot 2.81 \times 10^{37} [\text{m}^{-3}]} \times$$

$$\exp\left(-\frac{58.432 \times 1000 [\text{J mol}^{-1}]}{8.314 [\text{m}^2 \text{ kg s}^{-2} \text{ K}^{-1} \text{ mol}^{-1}] \times 313 [\text{K}]}\right)$$

$$= 7.4 \times 10^{-5} [\text{dm}^3 \text{ mol}^{-1} \text{ s}^{-1}] \text{ or } [\text{L mol}^{-1} \text{ s}^{-1}]$$

$$k_{\text{TST,IGT at 1 mol dm}^{-3}} = \frac{k_{\text{B}}T}{hC^{\circ}} \exp\left(-\frac{\Delta G_{1 \text{ mol/L}}^{\ddagger}}{RT}\right)$$

$$\Delta G_{1 \text{ mol/L}}^{\ddagger} = 101.5387 [\text{kJ mol}^{-1}]$$

$$k_{\text{TST,IGT at 1 mol dm}^{-3}} =$$

$$\frac{1.3806 \times 10^{-23} [\text{m}^2 \text{ kg s}^{-2} \text{ K}^{-1}] \times 313 [\text{K}]}{6.626 \times 10^{-34} [\text{m}^2 \text{ kg s}^{-1}]} \frac{1}{10^3 [\text{mol m}^{-3}]} \exp\left(-\frac{101.5387 \times 1000 [\text{J mol}^{-1}]}{8.314 [\text{m}^2 \text{ kg s}^{-2} \text{ K}^{-1} \text{ mol}^{-1}] \times 313 [\text{K}]}\right)$$

$$= 7.4 \times 10^{-5} [\text{dm}^3 \text{ mol}^{-1} \text{ s}^{-1}] \text{ or } [\text{L mol}^{-1} \text{ s}^{-1}]$$

$$k_{\text{TST,IGT at 1 atm}} = \frac{k_{\text{B}}T}{hC^{\circ}} \exp\left(-\frac{\Delta G_{1 \text{ atm}}^{\ddagger}}{RT}\right) = \frac{k_{\text{B}}T}{h} \frac{RT}{p} \exp\left(-\frac{\Delta G_{1 \text{ atm}}^{\ddagger}}{RT}\right)$$

$$\Delta G_{1 \text{ atm}}^{\ddagger} = 109.9863671 [\text{kJ mol}^{-1}]$$

$$k_{\text{TST,IGT at 1 atm}} =$$

$$\frac{1.3806 \times 10^{-23} [\text{m}^2 \text{ kg s}^{-2} \text{ K}^{-1}] \times 313 [\text{K}]}{6.626 \times 10^{-34} [\text{m}^2 \text{ kg s}^{-1}]} \frac{8.314 [\text{m}^2 \text{ kg s}^{-2} \text{ K}^{-1} \text{ mol}^{-1}] \times 313 [\text{K}]}{101300 [\text{Pa}]} \exp\left(-\frac{109.9863671 \times 1000 [\text{J mol}^{-1}]}{8.314 [\text{m}^2 \text{ kg s}^{-2} \text{ K}^{-1} \text{ mol}^{-1}] \times 313 [\text{K}]}\right)$$

$$= 7.4 \times 10^{-5} [\text{dm}^3 \text{ mol}^{-1} \text{ s}^{-1}] \text{ or } [\text{L mol}^{-1} \text{ s}^{-1}]$$

Appendix 7 The rate coefficient calculation ignoring  $PV$  based on the IGT.

In the IGT method,  $PV$  cannot be ignored when calculating the enthalpies of reactants A, B, and the activated complex TS. The rate coefficients calculated using the activation Gibbs energy without considering  $PV$  and those using partition function and potential energy difference, which should match, do not coincide.

In a unimolecular reaction, the number of molecules of reactants and the activated complex are equal, so whether or not  $PV$  is considered, its effect cancels out. However, in a bimolecular reaction, since there is one more reactant molecule than TS, if  $PV$  is not considered, the value of the activation Gibbs energy would increase by  $RT$  ( $= PV$ ). We are concerned that the rate coefficients calculated using the activation Gibbs energy without considering  $PV$  (eqn (56)) and those using the partition function and the potential energy difference (eqn (54)), which should ideally give the same result, in fact do not. We believe that this discrepancy arises from not applying equivalent corrections to the partition function despite correcting for  $RT$  ( $= PV$ ) when determining the enthalpy (and Gibbs energy). In this study, to prioritize consistency between eqs (54) and (56), we did not ignore the  $PV$  term in the IGT method. However, if the sole purpose is to determine the enthalpy or Gibbs energy, we believe it is reasonable to neglect  $PV$ .

Consider reaction A in ethanol.

$$k_{\text{TST\_IGT}} = \frac{k_{\text{B}}T}{h} L \frac{\frac{q_{\text{IGT,TS}}^{\circ}}{V^{\circ}}}{\frac{q_{\text{IGT,A}}^{\circ} q_{\text{IGT,B}}^{\circ}}{V^{\circ}}} \exp\left(-\frac{\Delta E_{\text{G}}^{\ddagger}}{RT}\right) \quad (54)$$

$$\begin{aligned} k_{\text{TST\_IGT}} &= \frac{1.3806 \times 10^{-23} [\text{m}^2 \text{ kg s}^{-2} \text{ K}^{-1}] \times 313.15 [\text{K}]}{6.626 \times 10^{-34} [\text{m}^2 \text{ kg s}^{-1}]} \times 6.02 \times 10^{23} \\ &\quad \frac{8.43 \times 10^{40} [\text{m}^{-3}]}{2.82 \times 10^{37} [\text{m}^{-3}] \cdot 2.82 \times 10^{37} [\text{m}^{-3}]} \times \exp\left(-\frac{73.7386 \times 1000 [\text{J mol}^{-1}]}{8.314 [\text{m}^2 \text{ kg s}^{-2} \text{ K}^{-1} \text{ mol}^{-1}] \times 313.15 [\text{K}]}\right) \\ &= 2.09 \times 10^{-10} [\text{m}^3 \text{ s}^{-1} \text{ mol}^{-1}] \\ &= 2.1 \times 10^{-7} [\text{dm}^3 \text{ mol}^{-1} \text{ s}^{-1}] \text{ or } [\text{L mol}^{-1} \text{ s}^{-1}] \end{aligned}$$

$$k_{\text{TST\_IGT}} = \frac{k_{\text{B}}T}{hC^{\circ}} \exp\left(-\frac{\Delta G_{\text{I}}^{\ddagger} \text{ mol/L}}{RT}\right) \quad (56)$$

$$\begin{aligned} k_{\text{TST\_IGT}} &= \frac{1.3806 \times 10^{-23} [\text{m}^2 \text{ kg s}^{-2} \text{ K}^{-1}] \times 313.15 [\text{K}]}{6.626 \times 10^{-34} [\text{m}^2 \text{ kg s}^{-1}]} \frac{1}{10^3 [\text{mol m}^{-3}]} \exp\left(-\frac{116.87 \times 1000 [\text{J mol}^{-1}]}{8.314 [\text{m}^2 \text{ kg s}^{-2} \text{ K}^{-1} \text{ mol}^{-1}] \times 313.15 [\text{K}]}\right) \\ &= 2.09 \times 10^{-10} [\text{m}^3 \text{ s}^{-1} \text{ mol}^{-1}] \\ &= 2.1 \times 10^{-7} [\text{dm}^3 \text{ mol}^{-1} \text{ s}^{-1}] \text{ or } [\text{L mol}^{-1} \text{ s}^{-1}] \end{aligned}$$



$$\begin{aligned}
k_{\text{TST IGT}} &= \frac{k_B T}{h c^\circ} \exp\left(-\frac{\Delta G_{1 \text{ mol/L, IGT, PV=0}}^\ddagger}{RT}\right) \\
&= \frac{1.3806 \times 10^{-23} [\text{m}^2 \text{ kg s}^{-2} \text{ K}^{-1}] \times 313 [\text{K}]}{6.626 \times 10^{-34} [\text{m}^2 \text{ kg s}^{-1}]} \frac{1}{10^3 [\text{mol m}^{-3}]} \exp\left(-\frac{116.87 \times 1000 + 2602.282 [\text{J mol}^{-1}]}{8.314 [\text{m}^2 \text{ kg s}^{-2} \text{ K}^{-1} \text{ mol}^{-1}] \times 313 [\text{K}]}\right) \\
&= 7.7 \times 10^{-8} [\text{dm}^3 \text{ mol}^{-1} \text{ s}^{-1}] \text{ or } [\text{L mol}^{-1} \text{ s}^{-1}]
\end{aligned}$$

Here,  $\Delta G_{1 \text{ mol/L, IGT, PV=0}}$  represents the activation Gibbs energy calculated by the IGT method with  $PV$  set to zero. In the case of a bimolecular reaction, there is a relationship between the Gibbs energy considering  $PV$  ( $\Delta G_{1 \text{ mol/L, IGT, PV}\neq 0}$ ) and the following.

$$\Delta G_{1 \text{ mol/L, IGT, PV=0}}^\ddagger = \Delta G_{1 \text{ mol/L, IGT, PV}\neq 0}^\ddagger + RT$$

It is evident from the above that the rate coefficients calculated using the two processes, which should be equivalent, do not agree. I attribute this discrepancy to the fact that the IGT method formulates the partition function on the basis of an ideal gas compressed to a volume of 1 dm<sup>3</sup>. Despite this, the gas is treated as ideal, leading to inaccurate results when calculating activation Gibbs energies and rate coefficients in accordance with statistical thermodynamics without considering  $PV$ . Of course, for the purpose of determining the enthalpy or Gibbs energy of the solute,  $PV$  can be considered negligible.

The aim of the present study was to formulate the partition function for the solute and derive rate coefficients from this function. To ensure coherence between the rate coefficients derived from the partition function and those obtained from the activation Gibbs energy, we have opted not to ignore  $PV$ , even within the IGT method.

Recognizing potential reader interest in how the rate coefficient changes when  $w_{PV}$  is disregarded in the calculation of activation Gibbs energy, we have shown values of  $k_{\text{TST, IGT}}$  ignoring  $w_{PV}$  in following table and figure. This approach provided worse predictions compared to the normal IGT.

TABLE. The activation enthalpies, activation entropies, activation Gibbs energies and rate coefficients for 12 reactions in various solvents based on the IGT technique (note that  $w_{PV}$  work has been ignored in calculations of  $H$ ).

| reaction | solvent      | Temp. [K] | $\Delta H^\ddagger$ [kJ mol <sup>-1</sup> ] | $\Delta S^\ddagger$ [J mol <sup>-1</sup> K <sup>-1</sup> ] | $\Delta G^\ddagger$ [kJ mol <sup>-1</sup> ] | $k_{TST,PV=0}$ [dm <sup>3</sup> mol <sup>-1</sup> s <sup>-1</sup> ] | $k'_{TST\_wigner}$ [dm <sup>3</sup> mol <sup>-1</sup> s <sup>-1</sup> ] | $k_{exp}$ [dm <sup>3</sup> mol <sup>-1</sup> s <sup>-1</sup> ] |
|----------|--------------|-----------|---------------------------------------------|------------------------------------------------------------|---------------------------------------------|---------------------------------------------------------------------|-------------------------------------------------------------------------|----------------------------------------------------------------|
| A        | Ethanol      | 313       | 73.1                                        | -148.2                                                     | 119.5                                       | $7.7 \times 10^{-8}$                                                | $8.9 \times 10^{-8}$                                                    | $4.6 \times 10^{-6}$ <sup>a</sup>                              |
| A        | THF          | 313       | 73.6                                        | -148.2                                                     | 119.4                                       | $7.9 \times 10^{-8}$                                                | $9.1 \times 10^{-8}$                                                    | $2.5 \times 10^{-6}$ <sup>a</sup>                              |
| A        | Toluene      | 313       | 72.3                                        | -149.0                                                     | 118.9                                       | $9.6 \times 10^{-8}$                                                | $1.1 \times 10^{-7}$                                                    | $4.0 \times 10^{-6}$ <sup>a</sup>                              |
| A        | cyclohexane  | 313       | 72.4                                        | -149.0                                                     | 119.1                                       | $8.8 \times 10^{-8}$                                                | $1.0 \times 10^{-7}$                                                    | $4.5 \times 10^{-6}$ <sup>b</sup>                              |
| A        | cyclohexane  | 333       | 72.6                                        | -148.5                                                     | 122.1                                       | $5.0 \times 10^{-7}$                                                | $5.7 \times 10^{-7}$                                                    | $2.3 \times 10^{-5}$ <sup>b</sup>                              |
| A        | cyclohexane  | 353       | 72.8                                        | -147.9                                                     | 125.5                                       | $2.3 \times 10^{-6}$                                                | $2.6 \times 10^{-6}$                                                    | $9.7 \times 10^{-5}$ <sup>b</sup>                              |
| A        | cyclohexane  | 373       | 73.0                                        | -147.4                                                     | 128.0                                       | $9.4 \times 10^{-6}$                                                | $1.0 \times 10^{-5}$                                                    | $3.5 \times 10^{-4}$ <sup>b</sup>                              |
| A        | cyclohexane  | 393       | 73.2                                        | -146.8                                                     | 131.0                                       | $3.3 \times 10^{-5}$                                                | $3.6 \times 10^{-5}$                                                    | $1.1 \times 10^{-3}$ <sup>b</sup>                              |
| B        | Ethanol      | 298       | 51.9                                        | -152.5                                                     | 97.2                                        | $5.7 \times 10^{-5}$                                                | $6.5 \times 10^{-5}$                                                    | $1.2 \times 10^{-2}$ <sup>c</sup>                              |
| B        | Chloroform   | 298       | 49.3                                        | -152.7                                                     | 94.8                                        | $1.5 \times 10^{-4}$                                                | $17 \times 10^{-4}$                                                     | $1.1 \times 10^{-2}$ <sup>c</sup>                              |
| B        | benzene      | 298       | 50.9                                        | -153.5                                                     | 96.5                                        | $7.6 \times 10^{-5}$                                                | $8.7 \times 10^{-5}$                                                    | $1.0 \times 10^{-2}$ <sup>c</sup>                              |
| C        | acetonitrile | 300       | 63.5                                        | -152.3                                                     | 107.5                                       | $1.2 \times 10^{-6}$                                                | $1.5 \times 10^{-6}$                                                    | $1.8 \times 10^{-5}$ <sup>d</sup>                              |

<sup>a</sup> ref 25 <sup>b</sup> ref 26 <sup>c</sup> ref 27 <sup>d</sup> ref 28

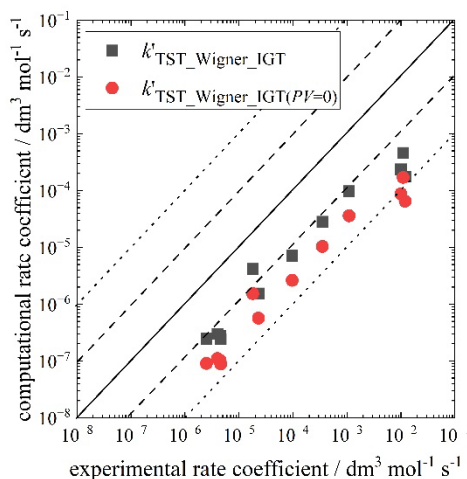

Figure. Correlations between experimental and computational  $k$  values for 12 bimolecular Diels-Alder reactions in various solutions and at various temperatures. The predicted  $k$  generated by both the new model and the IGT ( $w_{PV}$  is ignored) have been corrected using Wigner's tunneling effect.
