# Supplementary material for: Computation of rate coefficients in solutions based on transition state theory combined with a heuristically corrected polarizable continuum model: intermolecular Diels–Alder reactions as case studies
Source: Royal Society of Chemistry journal article supplement (doi:10.1039/d4cp01078g), 2024-01-01
Supplement: d4cp01078g2.zip [file esi_freq.xlsx]

## Sheet: example c6h5no in ethanol
Inputs
outputs
T	298
f_zpe	0.975	scaling factor of ZPE
f_vib	0.95	scaling factor of frequencies
					frequency	scaled freq	ZPE	q_vib	E_vib	S_vib	q_vib_total	E_vib_total	S_vib_total	ZPE_total	ZPE_total	Scaled ZPE	Scaled ZPE
constants					104.48	99.256	1.03772e-21	2.62651	1.02537	1.74511	11.1395	259.97	51.8673	4.26607e-22	0.0978513	4.15942e-22	0.095405
h	6.62607e-34	m2 kg /s			250.23	237.718	2.48534e-21	1.46489	1.12254	0.915354	-	kJ / mol	J / (mol K)	kJ/mol	hartree	kJ/mol	hartree
kb	1.38065e-23	m2 kg /s2 K			258.57	245.641	2.56817e-21	1.43977	1.13016	0.886048
R	8.31446	m2 kg s-2 K-1 mol-1			420.11	399.104	4.17262e-21	1.17041	1.31717	0.485711
NA	6.02214e+23				455.84	433.048	4.5275e-21	1.14102	1.36775	0.426755
					472.85	449.207	4.69645e-21	1.12907	1.39287	0.401312
					626.94	595.593	6.2269e-21	1.05975	1.64745	0.229857
					686.05	651.747	6.814e-21	1.04493	1.75612	0.185311
					687.49	653.115	6.8283e-21	1.04462	1.75883	0.184338
					780.55	741.522	7.75259e-21	1.02867	1.93983	0.130913
					847.42	805.049	8.41676e-21	1.02094	2.07596	0.10211
					870.65	827.117	8.64748e-21	1.01878	2.12426	0.0936172
					972.51	923.885	9.65918e-21	1.01169	2.34114	0.0637689
					1019.7	968.715	1.01279e-20	1.00939	2.444	0.0532852
					1021.76	970.672	1.01483e-20	1.0093	2.44852	0.0528678
					1036.18	984.371	1.02916e-20	1.0087	2.48022	0.050033
					1042.47	990.346	1.0354e-20	1.00845	2.49409	0.0488431
					1102.71	1047.57	1.09524e-20	1.0064	2.62782	0.038751
					1147.09	1089.74	1.13931e-20	1.00522	2.72735	0.0326414
					1188.61	1129.18	1.18055e-20	1.00431	2.82111	0.0277791
					1212.13	1151.52	1.20391e-20	1.00386	2.87448	0.0253451
					1339.27	1272.31	1.33019e-20	1.00215	3.16547	0.0153795
					1360.45	1292.43	1.35123e-20	1.00195	3.21428	0.0141429
					1497.39	1422.52	1.48724e-20	1.00104	3.53156	0.00819452
					1511.91	1436.31	1.50166e-20	1.00097	3.56534	0.00773097
					1619.6	1538.62	1.60862e-20	1.00059	3.81647	0.00500946
					1666.8	1583.46	1.6555e-20	1.00048	3.92681	0.00413749
					1686.12	1601.81	1.67469e-20	1.00044	3.97201	0.00382529
					3198.14	3038.23	3.17646e-20	1	7.52747	6.67442e-06
					3206.87	3046.53	3.18513e-20	1	7.54802	6.42883e-06
					3212.51	3051.88	3.19073e-20	1	7.56129	6.27497e-06
					3222.28	3061.17	3.20044e-20	1	7.58429	6.01708e-06
					3226.19	3064.88	3.20432e-20	1	7.59349	5.91684e-06

## Sheet: freq calc
Inputs
outputs
T
f_zpe		scaling factor of ZPE
f_vib		scaling factor of frequencies
					frequency	scaled freq	ZPE	q_vib	E_vib	S_vib	q_vib_total	E_vib_total	S_vib_total	ZPE_total	ZPE_total	Scaled ZPE	Scaled ZPE
constants						0	0	#DIV/0!	#DIV/0!	#DIV/0!	#DIV/0!	#DIV/0!	#DIV/0!	0	0	0	0
h	6.62607e-34	m2 kg /s				0	0	#DIV/0!	#DIV/0!	#DIV/0!	-	kJ / mol	J / (mol K)	kJ/mol	hartree	kJ/mol	hartree
kb	1.38065e-23	m2 kg /s2 K				0	0	#DIV/0!	#DIV/0!	#DIV/0!
R	8.31446	m2 kg s-2 K-1 mol-1				0	0	#DIV/0!	#DIV/0!	#DIV/0!
NA	6.02214e+23					0	0	#DIV/0!	#DIV/0!	#DIV/0!
						0	0	#DIV/0!	#DIV/0!	#DIV/0!
						0	0	#DIV/0!	#DIV/0!	#DIV/0!
						0	0	#DIV/0!	#DIV/0!	#DIV/0!
						0	0	#DIV/0!	#DIV/0!	#DIV/0!
						0	0	#DIV/0!	#DIV/0!	#DIV/0!
						0	0	#DIV/0!	#DIV/0!	#DIV/0!
						0	0	#DIV/0!	#DIV/0!	#DIV/0!
						0	0	#DIV/0!	#DIV/0!	#DIV/0!
						0	0	#DIV/0!	#DIV/0!	#DIV/0!
						0	0	#DIV/0!	#DIV/0!	#DIV/0!
						0	0	#DIV/0!	#DIV/0!	#DIV/0!
						0	0	#DIV/0!	#DIV/0!	#DIV/0!
						0	0	#DIV/0!	#DIV/0!	#DIV/0!
						0	0	#DIV/0!	#DIV/0!	#DIV/0!
						0	0	#DIV/0!	#DIV/0!	#DIV/0!
						0	0	#DIV/0!	#DIV/0!	#DIV/0!
						0	0	#DIV/0!	#DIV/0!	#DIV/0!
						0	0	#DIV/0!	#DIV/0!	#DIV/0!
						0	0	#DIV/0!	#DIV/0!	#DIV/0!
						0	0	#DIV/0!	#DIV/0!	#DIV/0!
						0	0	#DIV/0!	#DIV/0!	#DIV/0!
						0	0	#DIV/0!	#DIV/0!	#DIV/0!
						0	0	#DIV/0!	#DIV/0!	#DIV/0!
						0	0	#DIV/0!	#DIV/0!	#DIV/0!
						0	0	#DIV/0!	#DIV/0!	#DIV/0!
						0	0	#DIV/0!	#DIV/0!	#DIV/0!
						0	0	#DIV/0!	#DIV/0!	#DIV/0!
						0	0	#DIV/0!	#DIV/0!	#DIV/0!
