# Supplementary material for: Computation of rate coefficients in solutions based on transition state theory combined with a heuristically corrected polarizable continuum model: intermolecular Diels–Alder reactions as case studies
Source: Royal Society of Chemistry journal article supplement (doi:10.1039/d4cp01078g), 2024-01-01
Supplement: d4cp01078g2.zip [file esi_rate.xlsx]

## Sheet: reactant 1
polar non-linear molecules		Inputs
		outputs
constants
the Planck constant	h	6.62607e-34	m^2 kg / s
the Boltzman constant	kb	1.38065e-23	m^2 kg / (s^2 K)
the universal gas constant	R	8.31446	m^2 kg / (s^2 K mol)
pi	π	3.14159
the Avogadro number	NA	6.02214e+23	mol^-1
electron multiplicity		1	-
molar mass	m	80.0626	g/mol
temperature	T	298	K
standard concentration	C	1	mol/L
Volume of cavity	Vcav	168.541	A^3
Volume of a molecule	Vmol	119.565	A^3
V free	v_free	2.13106e-31	m^3
Ncell	N_cell	5.93327e+24
Nsolute	N_solute	6.02214e+23
the number of possible optical isomers	n_iso	1	-
the rotational symmetry number	σ	2	-
Rotational temp. A	θA	0.2444	K
Rotational temp. B	θB	0.24397	K
Rotational temp. C	θC	0.1297	K
Dipole moment of solute	m	0.7036	debye
Dipole moment of solute at vacuum	m_p	0.5157	debye
Polarizability	a	86.4596	-
Electric field in cavity	Ef	4.39674e+08	J / (m C)
	X	0.501611
Erectric energy	E_elec	-233.386	hartree
ZPE	ZPE	0.122894	hartree
ZPE scaling factor	f_zpe	0.975	-
Scaled ZPE	ZPE'	0.119821	hartree
Electric partition function	q_elec	1	-
Electric energy	E_elec	-612756	kJ / mol
Potential energy	E_0	-612442	kJ / mol
Electronic entropy	S_elec	0	J / (mol K)
Translational partition function	q_trans	147.592	-
Translational partition function per volume	q_trans / V	6.92578e+32	m^-3
Translational energy	E_trans	3.71656	kJ / mol
Translational entropy	S_trans	53.9979	J / (mol K)
Rotational partition function	q_rot	40766.3	-
Rotational energy	E_rot	4.28625	kJ / mol
Rotational entropy	S_rot	102.646	J / (mol K)
Vibrational partition function	q_vib	3.68338	-
Vibrational energy	E_vib	321.267	kJ / mol
Vibrational entropy	S_vib	33.2423	J / (mol K)
Configurational partittion function	q_config	25.4104	-
Configurational entropy	S_config	26.889	J / (mol K)
total partition function	qtot	5.63149e+08	-
total partition function per volume	qtot / V	2.64258e+39	m^-3
total energy or internal energy	U	-612427	kJ / mol
total entropy	S_tot	216.776	J / (mol K)
Gibbs energy	G	-612491	kJ / mol

## Sheet: reactant 2
polar non-linear molecules		Inputs
		outputs
constants
the Planck constant	h	6.62607e-34	m^2 kg / s
the Boltzman constant	kb	1.38065e-23	m^2 kg / (s^2 K)
the universal gas constant	R	8.31446	m^2 kg / (s^2 K mol)
pi	π	3.14159
the Avogadro number	NA	6.02214e+23	mol^-1
electron multiplicity		1	-
molar mass	m	107.037	g/mol
temperature	T	298	K
standard concentration	C	1	mol/L
Volume of cavity	Vcav	186.126	A^3
Volume of a molecule	Vmol	129.604	A^3
V free	v_free	2.73243e-31	m^3
Ncell	N_cell	5.3727e+24
Nsolute	N_solute	6.02214e+23
the number of possible optical isomers	n_iso	1	-
rotational symmetry No.	σ	1	-
Rotational temp. A	θA	0.25379	K
Rotational temp. B	θB	0.07941	K
Rotational temp. C	θC	0.06048	K
Dipole moment of solute	m	4.88775	debye
Dipole moment of solute at vacuum	m_p	3.88475	debye
Polarizability	P	104.427	-
Electric field in cavity	Ef	1.94314e+09	J / (m C)
	X	15.4
Erectric energy		-361.474	hartree
ZPE		0.0978513	hartree
ZPE scaling factor		0.975	-
Scaled ZPE		0.095405	hartree
Electric partition function	q_elec	1	-
Electric energy	E_elec	-949051	kJ / mol
Potential energy	E_0	-948800	kJ / mol
Electronic entropy	S_elec	0	J / (mol K)
Translational partition function	q_trans	292.533	-
Translational partition function per volume	q_trans / V	1.0706e+33	m^-3
Translational energy	E_trans	3.71656	kJ / mol
Translational entropy	S_trans	59.686	J / (mol K)
Rotational partition function	q_rot	16958.9	-
Rotational energy	E_rot	6.19426	kJ / mol
Rotational entropy	S_rot	101.757	J / (mol K)
Vibrational partition function	q_vib	11.1395	-
Vibrational energy	E_vib	259.97	kJ / mol
Vibrational entropy	S_vib	51.8673	J / (mol K)
Configurational partittion function	q_config	22.8788	-
Configurational entropy	S_config	26.0168	J / (mol K)
total partition function	qtot	1.26437e+09	-
total partition function per volume	qtot / V	4.62725e+39	m^-3
total energy or internal energy	U	-948781	kJ / mol
total entropy	S_tot	239.327	J / (mol K)
Gibbs energy	G	-948852	kJ / mol

## Sheet: ts
polar non-linear molecules		Inputs
		outputs
constants
the Planck constant	h	6.62607e-34	m^2 kg / s
the Boltzman constant	kb	1.38065e-23	m^2 kg / (s^2 K)
the universal gas constant	R	8.31446	m^2 kg / (s^2 K mol)
pi	π	3.14159
the Avogadro number	NA	6.02214e+23	mol^-1
electron multiplicity		1	-
molar mass	m	187.1	g/mol
temperature	T	298	K
standard concentration	C	1	mol/L
Volume of cavity	Vcav	320.045	A^3
Volume of a molecule	Vmol	236.312	A^3
V free	v_free	2.84573e-31	m^3
Ncell	N_cell	3.12456e+24
Nsolute	N_solute	6.02214e+23
the number of possible optical isomers	n_iso	2	-
the rotational symmetry number	σ	1	-
Rotational temp. A	θA	0.08087	K
Rotational temp. B	θB	0.0229	K
Rotational temp. C	θC	0.02146	K
Dipole moment of solute	m	2.77987	debye
Dipole moment of solute at vacuum	m_p	1.94904	debye
Polarizability	a	215.81	-
Electric field in cavity	Ef	7.78859e+08	J / (m C)
	X	3.5107
Erectric energy		-594.844	hartree
ZPE		0.223379	hartree
ZPE scaling factor		0.975	-
Scaled ZPE		0.217795	hartree
Electric partition function	q_elec	1	-
Electric energy	E_elec	-1.56176e+06	kJ / mol
Potential energy	E_0	-1.56119e+06	kJ / mol
Electronic entropy	S_elec	0	J / (mol K)
Translational partition function	q_trans	704.09	-
Translational partition function per volume	q_trans / V	2.4742e+33	m^-3
Translational energy	E_trans	3.71656	kJ / mol
Translational entropy	S_trans	66.9888	J / (mol K)
Rotational partition function	q_rot	799350	-
Rotational energy	E_rot	5.92639	kJ / mol
Rotational entropy	S_rot	132.894	J / (mol K)
Vibrational partition function	q_vib	2691.56	-
Vibrational energy	E_vib	595.642	kJ / mol
Vibrational entropy	S_vib	145.603	J / (mol K)
Configurational partittion function	q_config	12.7203	-
Configurational entropy	S_config	21.1378	J / (mol K)
total partition function	qtot	1.92694e+13	-
total partition function per volume	qtot / V	6.77133e+43	m^-3
total energy or internal energy	U	-1.56116e+06	kJ / mol
total entropy	S_tot	366.624	J / (mol K)
Gibbs energy	G	-1.56127e+06	kJ / mol

## Sheet: k_tst
T	298	K					DE‡	50.9311
h	6.62607e-34	m^2 kg / s					DH‡	50.322
kb	1.38065e-23	m^2 kg / (s^2 K)					DS‡	-89.4791
R	8.31446	m^2 kg / (s^2 K mol)					DG‡	76.9867
π	3.14159						kTST based on partiton function	0.000198687	m^3 mol^-1 s^-1
NA	6.02214e+23	mol^-1					kTST based on DG‡	0.000198956	m^3 mol^-1 s^-1
imaginary freq of TS	-387.72						kTST based on partiton function * k_wig	0.000227696	m^3 mol^-1 s^-1
kwig	1.146						kTST based on DG‡ * k_wig	0.000228004	m^3 mol^-1 s^-1
			reactant 1	reactant 2	TS	qTS /P qreactans
		qelec [-]	1	1	1	1
		qrans [-]	147.592	292.533	704.09	0.0163075
		qrot [-]	40766.3	16958.9	799350	0.00115622
		qvib [-]	3.68338	11.1395	2691.56	65.598
		qconfig [-]	25.4104	22.8788	12.7203	0.0218803
		qtot [-]	5.63149e+08	1.26437e+09	1.92694e+13	2.70627e-05
		E0	-612442	-948800	-1.56119e+06	50.9311
		V	0.001	0.001	0.001
		qtot /V [m^3]	5.63149e+11	1.26437e+12	1.92694e+16	2.70627e-08
		Eelec	-612756	-949051	-1.56176e+06	44.1872
		Erans	3.71656	3.71656	3.71656	-3.71656
		Erot	4.28625	6.19426	5.92639	-4.55412
		Evib	321.267	259.97	595.642	14.4055
		H	-612427	-948781	-1.56116e+06	50.322
		Selec	0	0	0	0
		Strans	53.9979	59.686	66.9888	-46.6951
		Srot	102.646	101.757	132.894	-71.5097
		Svib	33.2423	51.8673	145.603	60.4937
		Sconfig	26.889	26.0168	21.1378	-31.768
		Stot	216.776	239.327	366.624	-89.4791
		G	-612491	-948852	-1.56127e+06	76.9867
