# Supplementary material for: Computation of rate coefficients in solutions based on transition state theory combined with a heuristically corrected polarizable continuum model: intermolecular Diels–Alder reactions as case studies
Source: Royal Society of Chemistry journal article supplement (doi:10.1039/d4cp01078g), 2024-01-01
Supplement: d4cp01078g2.zip [file esi_thermo.xlsx]

## Sheet: example c6h5no in ethanol
polar non-linear molecules		Inputs
		outputs
constants
the Planck constant	h	6.62607e-34	m^2 kg / s
the Boltzman constant	kb	1.38065e-23	m^2 kg / (s^2 K)
the universal gas constant	R	8.31446	m^2 kg / (s^2 K mol)
pi	π	3.14159
the Avogadro number	NA	6.02214e+23	mol^-1
electron multiplicity		1	-
molar mass	m	80.0626	g/mol
temperature	T	298	K
standard concentration	C	1	mol/L
Volume of cavity	Vcav	168.541	A^3
Volume of a molecule	Vmol	119.565	A^3
V free	v_free	2.13106e-31	m^3
Ncell	N_cell	5.93327e+24
Nsolute	N_solute	6.02214e+23
the number of possible optical isomers	n_iso	1	-
the rotational symmetry number	σ	2	-
Rotational temp. A	θA	0.2444	K
Rotational temp. B	θB	0.24397	K
Rotational temp. C	θC	0.1297	K
Dipole moment of solute	m	0.7036	debye
Dipole moment of solute at vacuum	m_p	0.5157	debye
Polarizability	a	86.4596	-
Electric field in cavity	Ef	4.39674e+08	J / (m C)
	X	0.501611
Erectric energy	E_elec	-233.371	hartree
ZPE	ZPE	0.122894	hartree
ZPE scaling factor	f_zpe	0.975	-
Scaled ZPE	ZPE'	0.119821	hartree
Electric partition function	q_elec	1	-
Electric energy	E_elec	-612716	kJ / mol
Potential energy	E_0	-612402	kJ / mol
Electronic entropy	S_elec	0	J / (mol K)
Translational partition function	q_trans	147.592	-
Translational energy	E_trans	3.71656	kJ / mol
Translational entropy	S_trans	53.9979	J / (mol K)
Rotational partition function	q_rot	40766.3	-
Rotational energy	E_rot	4.28625	kJ / mol
Rotational entropy	S_rot	102.646	J / (mol K)
Vibrational partition function	q_vib	3.68338	-
Vibrational energy	E_vib	321.267	kJ / mol
Vibrational entropy	S_vib	33.2423	J / (mol K)
Configurational partittion function	q_config	25.4104	-
Configurational entropy	S_config	26.889	J / (mol K)
total partition function	qtot	5.63149e+08	-
total energy or internal energy	U	-612387	kJ / mol
total entropy	S_tot	216.776	J / (mol K)
Gibbs energy	G	-612452	kJ / mol

## Sheet: polar non-linear molecule
polar non-linear molecules		Inputs
		outputs
constants
the Planck constant	h	6.62607e-34	m^2 kg / s
the Boltzman constant	kb	1.38065e-23	m^2 kg / (s^2 K)
the universal gas constant	R	8.31446	m^2 kg / (s^2 K mol)
pi	π	3.14159
the Avogadro number	NA	6.02214e+23	mol^-1
electron multiplicity			-
molar mass	m		g/mol
temperature	T		K
standard concentration	C		mol/L
Volume of cavity	Vcav		A^3
Volume of a molecule	Vmol		A^3
V free	v_free	0	m^3
Ncell	N_cell	#DIV/0!
Nsolute	N_solute	0
the number of possible optical isomers	n_iso		-
the rotational symmetry number	σ		-
Rotational temp. A	θA		K
Rotational temp. B	θB		K
Rotational temp. C	θC		K
Dipole moment of solute	m		debye
Dipole moment of solute at vacuum	m_p		debye
Polarizability	a		-
Electric field in cavity	Ef	#DIV/0!	J / (m C)
	X	#DIV/0!
Erectric energy	E_elec		hartree
ZPE	ZPE		hartree
ZPE scaling factor	f_zpe		-
Scaled ZPE	ZPE'	0	hartree
Electric partition function	q_elec	0	-
Electric energy	E_elec	0	kJ / mol
Potential energy	E_0	0	kJ / mol
Electronic entropy	S_elec	#NUM!	J / (mol K)
Translational partition function	q_trans	0	-
Translational energy	E_trans	0	kJ / mol
Translational entropy	S_trans	#NUM!	J / (mol K)
Rotational partition function	q_rot	#DIV/0!	-
Rotational energy	E_rot	#DIV/0!	kJ / mol
Rotational entropy	S_rot	#DIV/0!	J / (mol K)
Vibrational partition function	q_vib		-
Vibrational energy	E_vib		kJ / mol
Vibrational entropy	S_vib		J / (mol K)
Configurational partittion function	q_config	#DIV/0!	-
Configurational entropy	S_config	#DIV/0!	J / (mol K)
total partition function	qtot	#DIV/0!	-
total energy or internal energy	U	#DIV/0!	kJ / mol
total entropy	S_tot	#NUM!	J / (mol K)
Gibbs energy	G	#DIV/0!	kJ / mol

## Sheet: polar linear molecule
polar linear molecules		Inputs
		outputs
constants
the Planck constant	h	6.62607e-34	m^2 kg / s
the Boltzman constant	kb	1.38065e-23	m^2 kg / (s^2 K)
the universal gas constant	R	8.31446	m^2 kg / (s^2 K mol)
pi	π	3.14159
the Avogadro number	NA	6.02214e+23	mol^-1
electron multiplicity			-
molar mass	m		g/mol
temperature	T		K
standard concentration	C		mol/L
Volume of cavity	Vcav		A^3
Volume of a molecule	Vmol		A^3
V free	v_free	0	m^3
Ncell	N_cell	#DIV/0!
Nsolute	N_solute	0
the number of possible optical isomers	n_iso		-
the rotational symmetry number	σ		-
Rotational temp. A	θA		K
Dipole moment of solute	m		debye
Dipole moment of solute at vacuum	m_p		debye
Polarizability	a		-
Electric field in cavity	Ef	#DIV/0!	J / (m C)
	X	#DIV/0!
Erectric energy	E_elec		hartree
ZPE	ZPE		hartree
ZPE scaling factor	f_zpe		-
Scaled ZPE	ZPE'	0	hartree
Electric partition function	q_elec	0	-
Electric energy	E_elec	0	kJ / mol
Potential energy	E_0	0	kJ / mol
Electronic entropy	S_elec	#NUM!	J / (mol K)
Translational partition function	q_trans	0	-
Translational energy	E_trans	0	kJ / mol
Translational entropy	S_trans	#NUM!	J / (mol K)
Rotational partition function	q_rot	#DIV/0!	-
Rotational energy	E_rot	#DIV/0!	kJ / mol
Rotational entropy	S_rot	#DIV/0!	J / (mol K)
Vibrational partition function	q_vib		-
Vibrational energy	E_vib		kJ / mol
Vibrational entropy	S_vib		J / (mol K)
Configurational partittion function	q_config	#DIV/0!	-
Configurational entropy	S_config	#DIV/0!	J / (mol K)
total partition function	qtot	#DIV/0!	-
total energy or internal energy	U	#DIV/0!	kJ / mol
total entropy	S_tot	#NUM!	J / (mol K)
Gibbs energy	G	#DIV/0!	kJ / mol

## Sheet: non-polar non-linear molecule
non-polar non-linear molecules		Inputs
		outputs
constants
the Planck constant	h	6.62607e-34	m^2 kg / s
the Boltzman constant	kb	1.38065e-23	m^2 kg / (s^2 K)
the universal gas constant	R	8.31446	m^2 kg / (s^2 K mol)
pi	π	3.14159
the Avogadro number	NA	6.02214e+23	mol^-1
electron multiplicity			-
molar mass	m		g/mol
temperature	T		K
standard concentration	C		mol/L
Volume of cavity	Vcav		A^3
Volume of a molecule	Vmol		A^3
V free	v_free	0	m^3
Ncell	N_cell	#DIV/0!
Nsolute	N_solute	0
the number of possible optical isomers	n_iso		-
rotational symmetry No.	σ		-
Rotational temp. A	θA		K
Rotational temp. B	θB		K
Rotational temp. C	θC		K
Erectric energy			hartree
ZPE			hartree
ZPE scaling factor			-
Scaled ZPE		0	hartree
Electric partition function	q_elec	0	-
Electric energy	E_elec	0	kJ / mol
Potential energy	E_0	0	kJ / mol
Electronic entropy	S_elec	#NUM!	J / (mol K)
Translational partition function	q_trans	0	-
Translational energy	E_trans	0	kJ / mol
Translational entropy	S_trans	#NUM!	J / (mol K)
Rotational partition function	q_rot	#DIV/0!	-
Rotational energy	E_rot	0	kJ / mol
Rotational entropy	S_rot	#DIV/0!	J / (mol K)
Vibrational partition function	q_vib		-
Vibrational energy	E_vib		kJ / mol
Vibrational entropy	S_vib		J / (mol K)
Configurational partittion function	q_config	#DIV/0!	-
Configurational entropy	S_config	#DIV/0!	J / (mol K)
total partition function	qtot	#DIV/0!	-
total energy or internal energy	U	0	kJ / mol
total entropy	S_tot	#NUM!	J / (mol K)
Gibbs energy	G	#NUM!	kJ / mol

## Sheet: non-polar linear molecule
non-polar linear molecules		Inputs
		outputs
constants
the Planck constant	h	6.62607e-34	m^2 kg / s
the Boltzman constant	kb	1.38065e-23	m^2 kg / (s^2 K)
the universal gas constant	R	8.31446	m^2 kg / (s^2 K mol)
pi	π	3.14159
the Avogadro number	NA	6.02214e+23	mol^-1
electron multiplicity			-
molar mass	m		g/mol
temperature	T		K
standard concentration	C		mol/L
Volume of cavity	Vcav		A^3
Volume of a molecule	Vmol		A^3
V free	v_free	0	m^3
Ncell	N_cell	#DIV/0!
Nsolute	N_solute	0
rotational symmetry No.	σ		-
Rotational temp. A	θA		K
Erectric energy			hartree
ZPE			hartree
ZPE scaling factor			-
Scaled ZPE		0	hartree
Electric partition function	q_elec	0	-
Electric energy	E_elec	0	kJ / mol
Potential energy	E_0	0	kJ / mol
Electronic entropy	S_elec	#NUM!	J / (mol K)
Translational partition function	q_trans	0	-
Translational energy	E_trans	0	kJ / mol
Translational entropy	S_trans	#NUM!	J / (mol K)
Rotational partition function	q_rot	#DIV/0!	-
Rotational energy	E_rot	0	kJ / mol
Rotational entropy	S_rot	#DIV/0!	J / (mol K)
Vibrational partition function	q_vib		-
Vibrational energy	E_vib		kJ / mol
Vibrational entropy	S_vib		J / (mol K)
Configurational partittion function	q_config	#DIV/0!	-
Configurational entropy	S_config	#DIV/0!	J / (mol K)
total partition function	qtot	#DIV/0!	-
total energy or internal energy	U	0	kJ / mol
total entropy	S_tot	#NUM!	J / (mol K)
Gibbs energy	G	#NUM!	kJ / mol

## Sheet: IGT non-linear molecule
IGT non-linear molecules		Inputs
		outputs
constants
the Planck constant	h	6.62607e-34	m^2 kg / s
the Boltzman constant	kb	1.38065e-23	m^2 kg / (s^2 K)
the universal gas constant	R	8.31446	m^2 kg / (s^2 K mol)
pi	π	3.14159
the Avogadro number	NA	6.02214e+23	mol^-1
electron multiplicity			-
molar mass	m		g/mol
temperature	T		K
standard concentration	C		mol/L
standard pressure	p		atm
V	V	#DIV/0!	m^3
the number of possible optical isomers	n_iso	1	-
rotational symmetry No.	σ	2	-
Rotational temp. A	θA	0.2444	K
Rotational temp. B	θB	0.24397	K
Rotational temp. C	θC	0.1297	K
Erectric energy			hartree
ZPE			hartree
ZPE scaling factor			-
Scaled ZPE		0	hartree
Electric partition function	q_elec	0	-
Electric energy	E_elec	0	kJ / mol
Potential energy	E_0	0	kJ / mol
Electronic entropy	S_elec	#NUM!	J / (mol K)
Translational partition function	q_trans	#DIV/0!	-
Translational energy	E_trans	0	kJ / mol
Translational entropy	S_trans	#DIV/0!	J / (mol K)
Rotational partition function	q_rot	0	-
Rotational energy	E_rot	0	kJ / mol
Rotational entropy	S_rot	#NUM!	J / (mol K)
Vibrational partition function	q_vib		-
Vibrational energy	E_vib		kJ / mol
Vibrational entropy	S_vib		J / (mol K)
PV work	w_pv	0	kJ / mol
total partition function	qtot	#DIV/0!	-
Enthalpy	H	0	kJ / mol
total entropy	S_tot	#DIV/0!	J / (mol K)
Gibbs energy	G	#DIV/0!	kJ / mol

## Sheet: IGT linear molecule
IGT linear molecules		Inputs
		outputs
constants
the Planck constant	h	6.62607e-34	m^2 kg / s
the Boltzman constant	kb	1.38065e-23	m^2 kg / (s^2 K)
the universal gas constant	R	8.31446	m^2 kg / (s^2 K mol)
pi	π	3.14159
the Avogadro number	NA	6.02214e+23	mol^-1
electron multiplicity			-
molar mass	m		g/mol
temperature	T		K
standard concentration	C		mol/L
standard pressure	p		atm
V	V	#DIV/0!	m^3
the number of possible optical isomers	n_iso		-
rotational symmetry No.	σ		-
Rotational temp. A	θA		K
Erectric energy			hartree
ZPE			hartree
ZPE scaling factor			-
Scaled ZPE		0	hartree
Electric partition function	q_elec	0	-
Electric energy	E_elec	0	kJ / mol
Potential energy	E_0	0	kJ / mol
Electronic entropy	S_elec	#NUM!	J / (mol K)
Translational partition function	q_trans	#DIV/0!	-
Translational energy	E_trans	0	kJ / mol
Translational entropy	S_trans	#DIV/0!	J / (mol K)
Rotational partition function	q_rot	#DIV/0!	-
Rotational energy	E_rot	0	kJ / mol
Rotational entropy	S_rot	#DIV/0!	J / (mol K)
Vibrational partition function	q_vib		-
Vibrational energy	E_vib		kJ / mol
Vibrational entropy	S_vib		J / (mol K)
PV work	w_pv	0	kJ / mol
total partition function	qtot	#DIV/0!	-
Enthalpy	H	0	kJ / mol
total entropy	S_tot	#DIV/0!	J / (mol K)
Gibbs energy	G	#DIV/0!	kJ / mol
